# Supplementary material for: Green inhibitor of carbon steel corrosion in 1 M hydrochloric acid:Eruca sativaseed extract (experimental and theoretical studies)
Source: Royal Society of Chemistry journal article supplement (doi:10.1039/d2ra01296k), 2022-01-01
Supplement: d2ra01296k1.pdf [file d2ra01296k1.pdf]

## Supporting Information (SI)

### Green inhibitor of Carbon steel corrosion in 1 M hydrochloric acid: *Eruca sativa* seeds extract (Experimental and Theoretical studies)

#### Weight loss results:

Table S1

Weight loss measurements of carbon steel in 1M HCl solution containing various concentrations of *eruca sativa* seeds extract after immersion time for 90min at 25, 35 °C,

| Conc.<br>,<br>g/L | 25 °C                            |           |         |                                               | 35 °C                            |           |         |                                               |
|-------------------|----------------------------------|-----------|---------|-----------------------------------------------|----------------------------------|-----------|---------|-----------------------------------------------|
|                   | $\Delta m$<br>mgcm <sup>-2</sup> | $\theta$  | %I<br>E | C.R.<br>mg cm <sup>-2</sup> min <sup>-1</sup> | $\Delta w$<br>mgcm <sup>-2</sup> | $\theta$  | %I<br>E | C.R.<br>mg cm <sup>-2</sup> min <sup>-1</sup> |
| <b>Blank</b>      | 22.81±0.00<br>4                  |           |         | 0.3802                                        | 25.30±0.00<br>3                  |           |         | 0.4209                                        |
| <b>0.05</b>       | 3.43±0.002                       | 0.85<br>0 | 85.0    | 0.0571                                        | 7.83±0.001                       | 0.69<br>0 | 69.0    | 0.1305<br>2                                   |
| <b>0.10</b>       | 2.98±0.001                       | 0.87<br>0 | 87.0    | 0.0496                                        | 7.66±0.002                       | 0.69<br>7 | 69.7    | 0.1276<br>0                                   |
| <b>0.15</b>       | 2.28±0.003                       | 0.90<br>0 | 90.0    | 0.0378<br>8                                   | 6.74±0.001                       | 0.73<br>3 | 73.3    | 0.1122<br>7                                   |
| <b>0.20</b>       | 1.84±0.001                       | 0.91<br>9 | 91.9    | 0.0306<br>1                                   | 5.05±0.003                       | 0.80<br>0 | 80.0    | 0.0842<br>1                                   |
| <b>0.25</b>       | 1.39±0.001                       | 0.93<br>9 | 93.9    | 0.0232<br>1                                   | 4.61±0.001                       | 0.81<br>7 | 81.7    | 0.0768<br>4                                   |
| <b>0.30</b>       | 1.184±0.00<br>2                  | 0.94<br>8 | 94.8    | 0.0197<br>3                                   | 3.34±0.002                       | 0.86<br>8 | 86.8    | 0.0557<br>0                                   |

Table S2

| Conc.,<br>Ppm | 45 °C                            |          |      |                                            | 55 °C                            |          |      |                                            |
|---------------|----------------------------------|----------|------|--------------------------------------------|----------------------------------|----------|------|--------------------------------------------|
|               | $\Delta w$<br>$\text{mgcm}^{-2}$ | $\theta$ | %IE  | C.R.<br>$\text{mg cm}^{-2}\text{min}^{-1}$ | $\Delta w$<br>$\text{mgcm}^{-2}$ | $\theta$ | %IE  | C.R.<br>$\text{mg cm}^{-2}\text{min}^{-1}$ |
| <b>Blank</b>  | 26.39±0.002                      |          |      | 0.4365                                     | 27.43±0.005                      |          |      | 0.4630                                     |
| <b>0.05</b>   | 13.49±0.001                      | 0.447    | 44.7 | 0.2248                                     | 17.13±0.003                      | 0.383    | 38.3 | 0.2856                                     |
| <b>0.10</b>   | 13.34±0.003                      | 0.453    | 45.3 | 0.2223                                     | 16.26±0.002                      | 0.415    | 41.5 | 0.2710                                     |
| <b>0.15</b>   | 12.27±0.002                      | 0.497    | 49.7 | 0.2045                                     | 15.20±0.002                      | 0.453    | 45.3 | 0.2533                                     |
| <b>0.20</b>   | 10.76±0.004                      | 0.559    | 55.9 | 0.1794                                     | 12.46±0.001                      | 0.552    | 55.2 | 0.2076                                     |
| <b>0.25</b>   | 9.45±0.002                       | 0.613    | 61.3 | 0.1575                                     | 10.97±0.001                      | 0.605    | 60.5 | 0.1828                                     |
| <b>0.30</b>   | 8.48±0.003                       | 0.652    | 65.2 | 0.1413                                     | 10.11±0.002                      | 0.636    | 63.6 | 0.1690                                     |

Weight loss measurements of carbon steel in 1M HCl solution containing various concentrations of eruca sativa seeds extract after immersion time for 90min at 45, 55 °C,

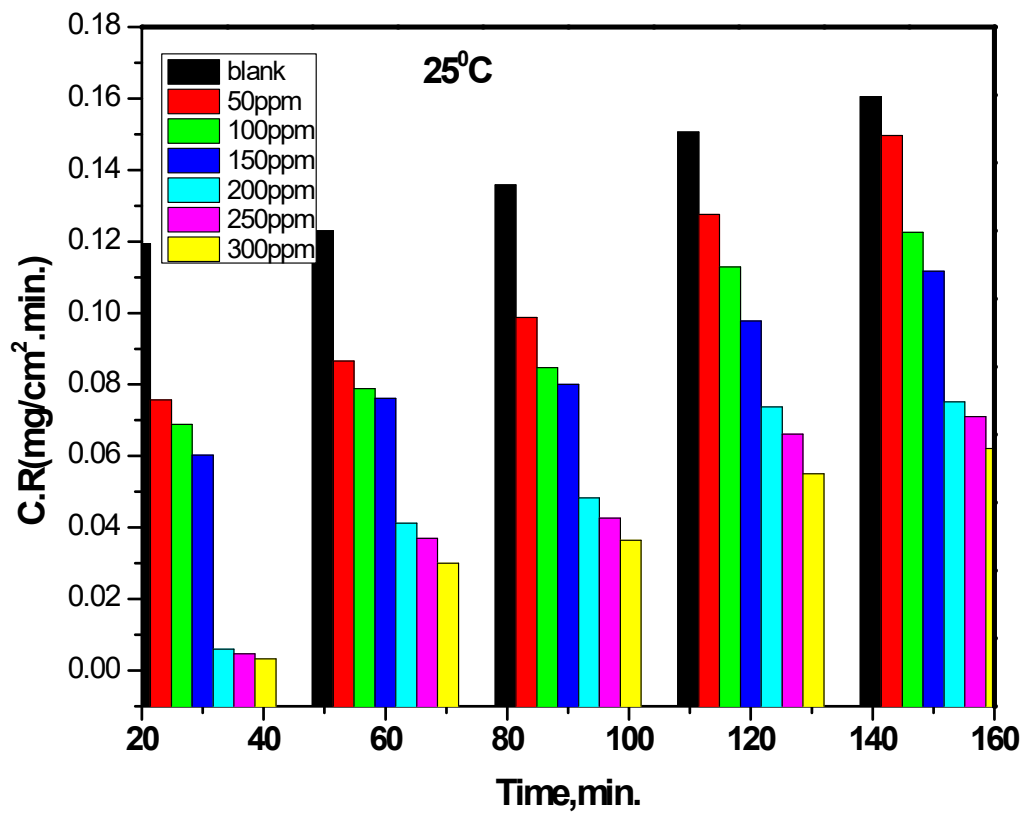

Figure S1 depicts the corrosion rate of a carbon steel electrode dipped in a 1 M HCl solution containing various concentrations of eruca sativa seeds extract at 25°C as a function of time.

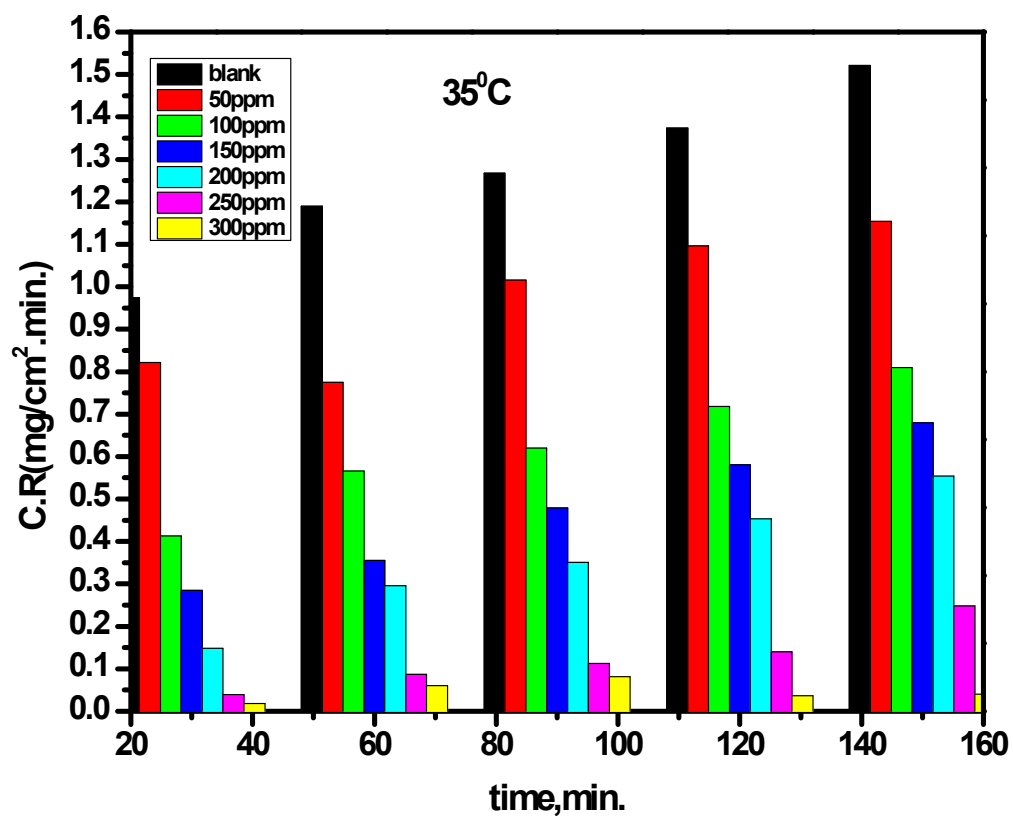

Figure S2 depicts the corrosion rate of a carbon steel electrode dipped in a 1 M HCl solution containing various concentrations of eruca sativa seeds extract at 35°C as a function of time.

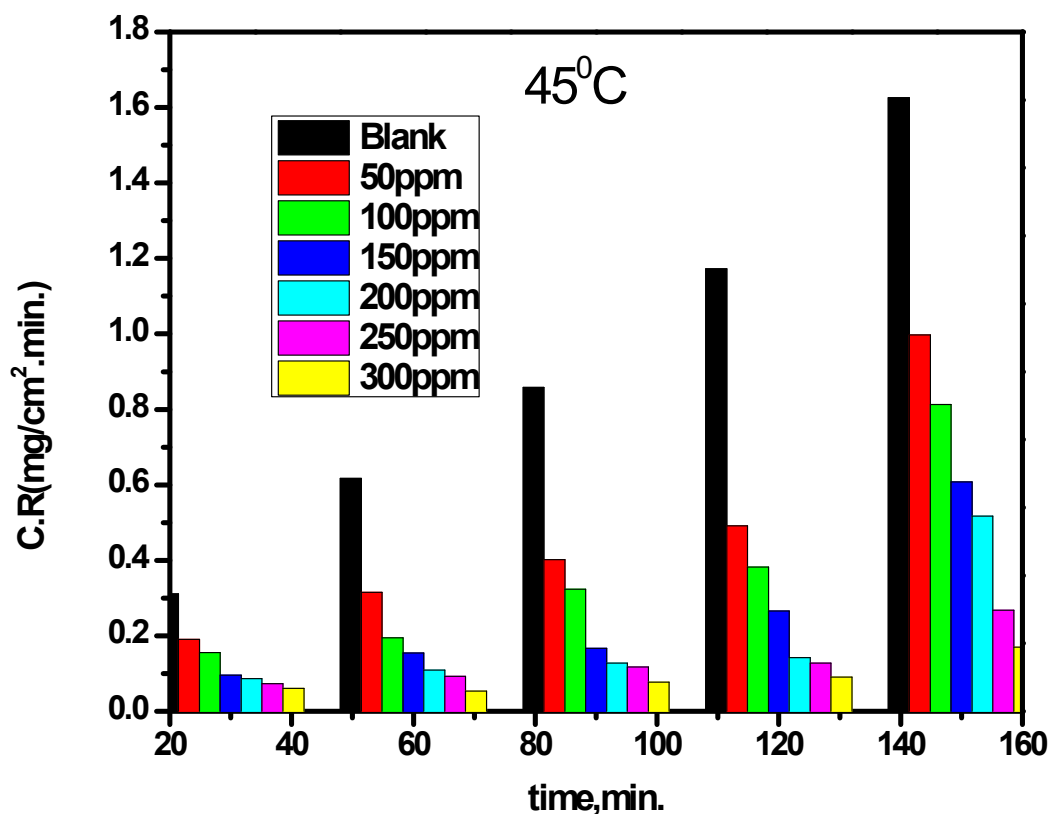

Figure S3 depicts the corrosion rate of a carbon steel electrode dipped in a 1 M HCl solution containing various concentrations of eruca sativa seeds extract at 45°C as a function of time.

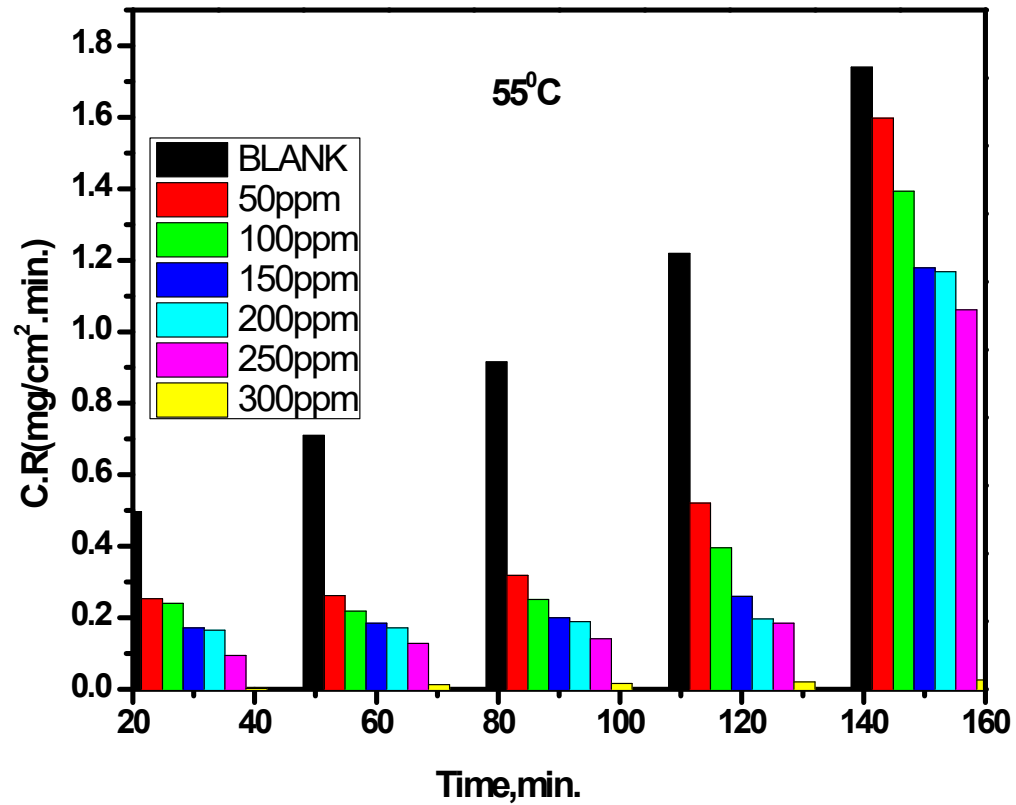

Figure S4 depicts the corrosion rate of a carbon steel electrode dipped in a 1 M HCl solution containing various concentrations of eruca sativa seeds extract at 55°C as a function of time

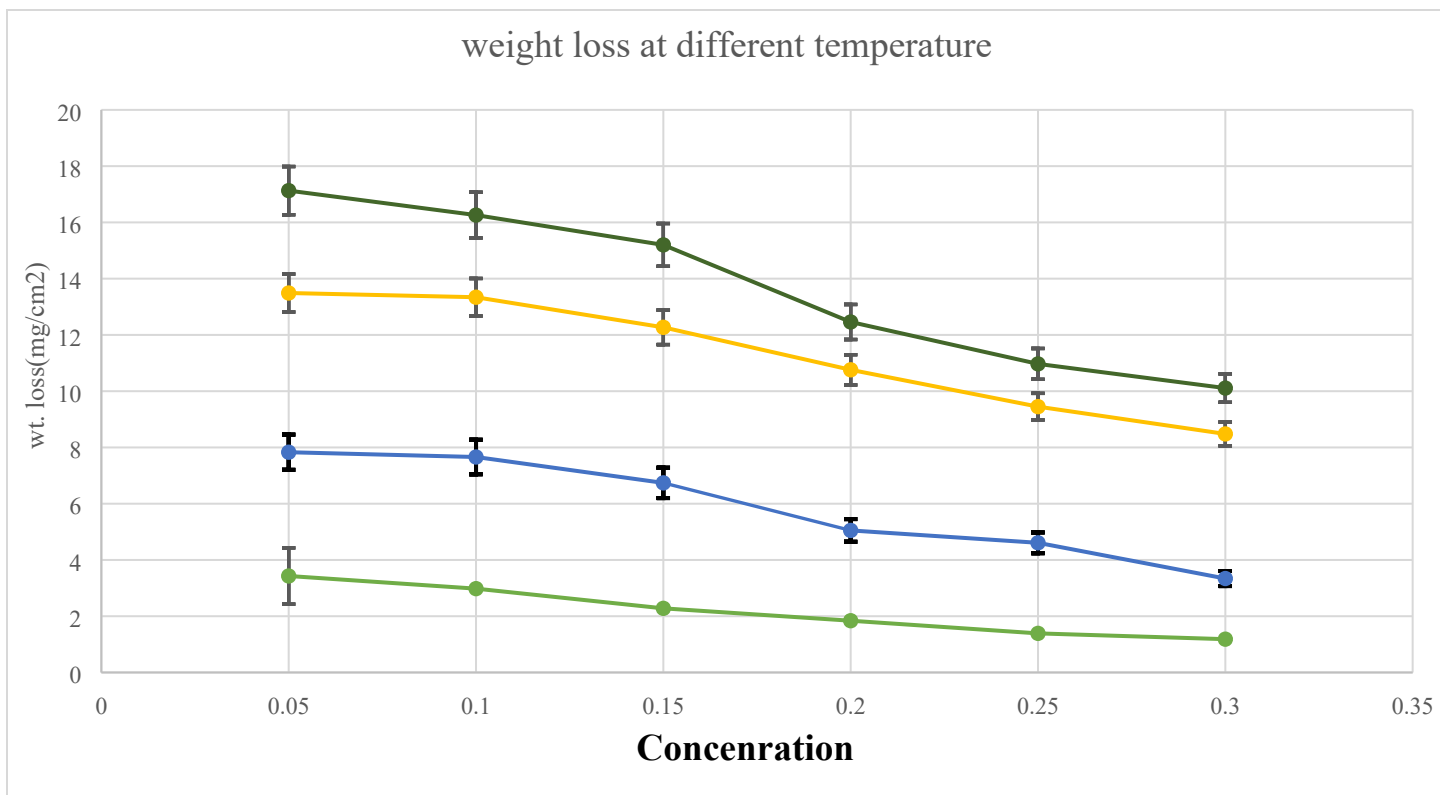

Fig. S5. Standard deviation of weight loss results of carbon steel electrode dipped in 1 M HCl solution with different concentrations (0.05-0.30g/L) of eruca sativa seeds, after a 90-minute immersion time at various temperatures (25-55°C)..

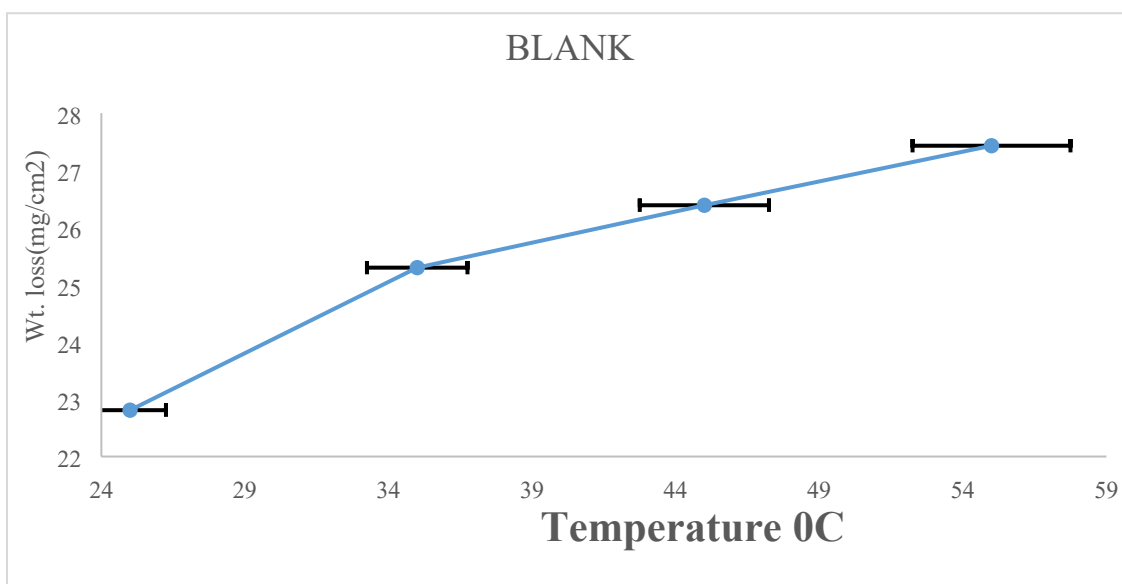

Fig. S6. Standard deviation of weight loss results of carbon steel electrode dipped in 1 M HCl solution without different concentrations of eruca sativa seeds, after a 90-minute immersion time at various temperatures (25-55°C).

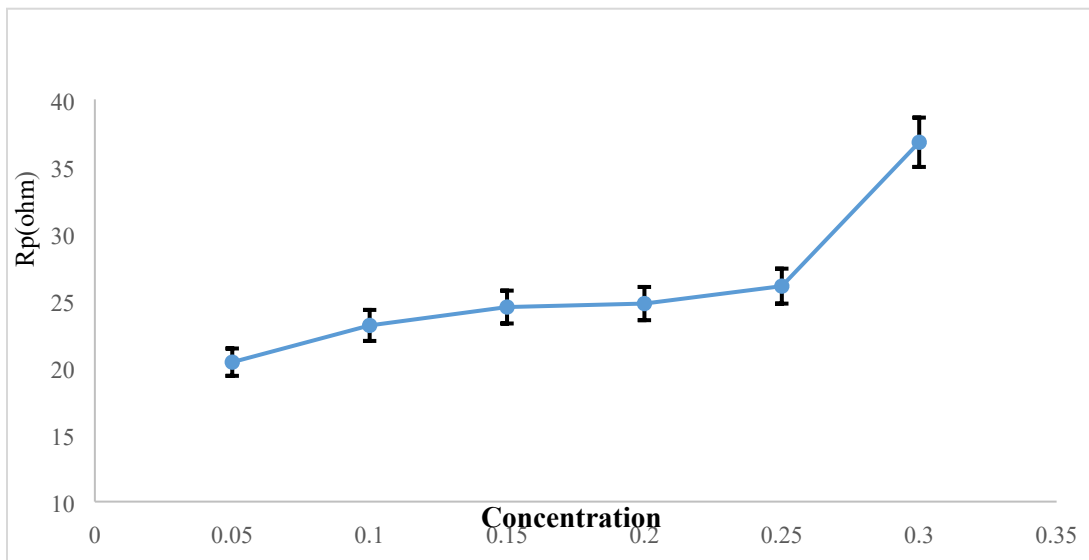

**Fig. S7.** Standard deviation of resistance polarization results of carbon steel electrode dipped in 1 M HCl solution with different concentrations (0.05-0.30g/L) of eruca sativa seeds, at (25°C)..



## Adsorption isotherms

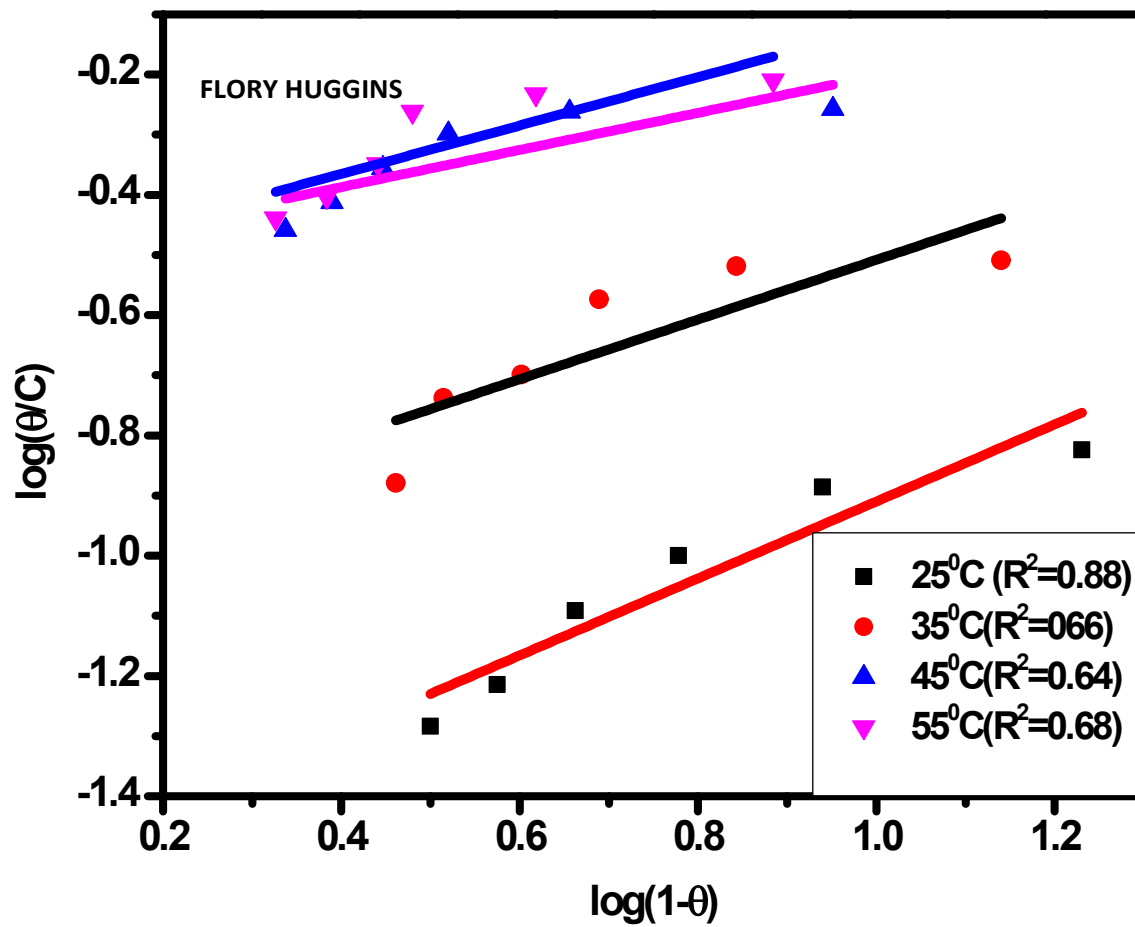

Fig. S8. Flory- Huggins adsorption isotherm plotted as  $\log\theta/C$  vs.  $\log(1-\theta)$  of eruca sativa seeds extract for corrosion of carbon steel in 1 M HCl solution at 25 °C.

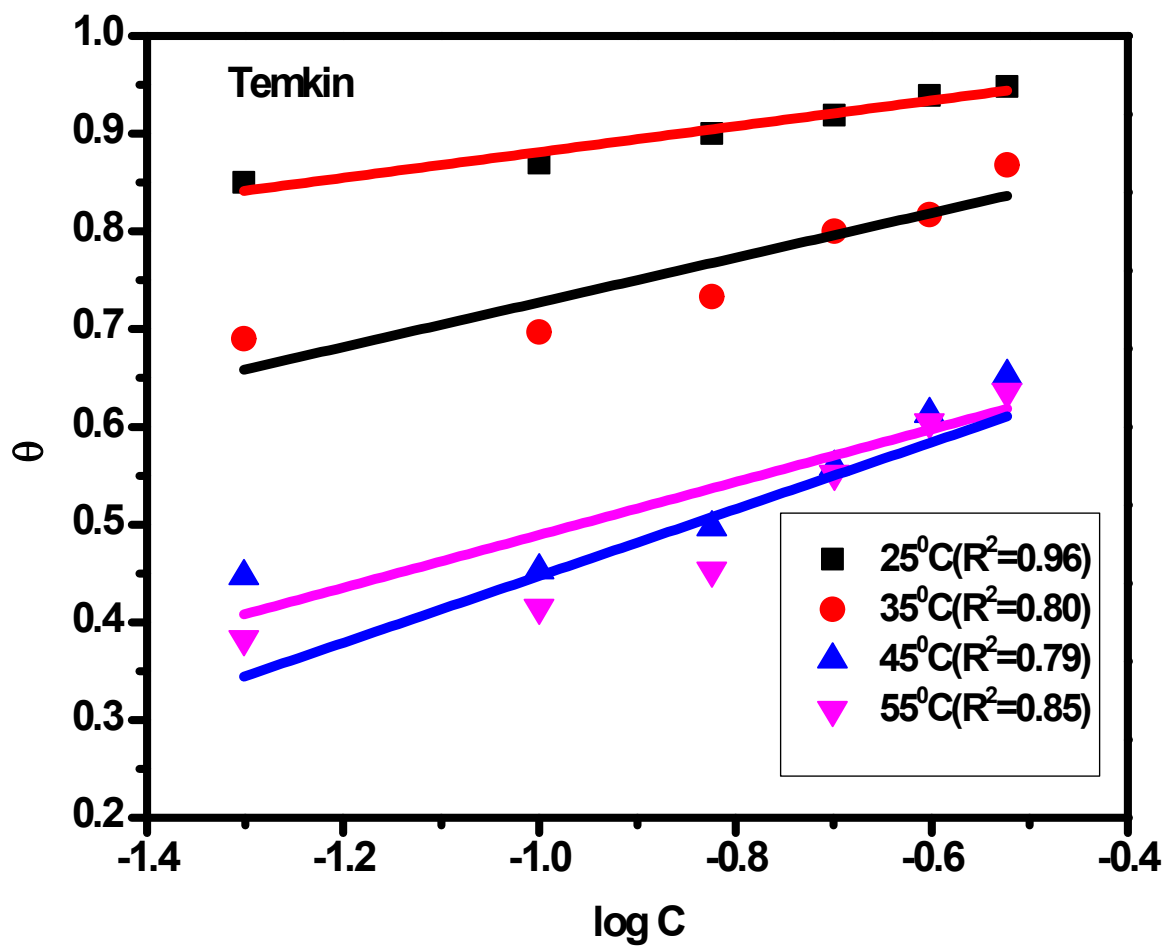

Fig. S9. Temkin adsorption isotherm plotted as  $\theta$  vs.  $\log C$  of eruca sativa seeds extract for corrosion of carbon steel in 1 M HCl solution at 25 °C.

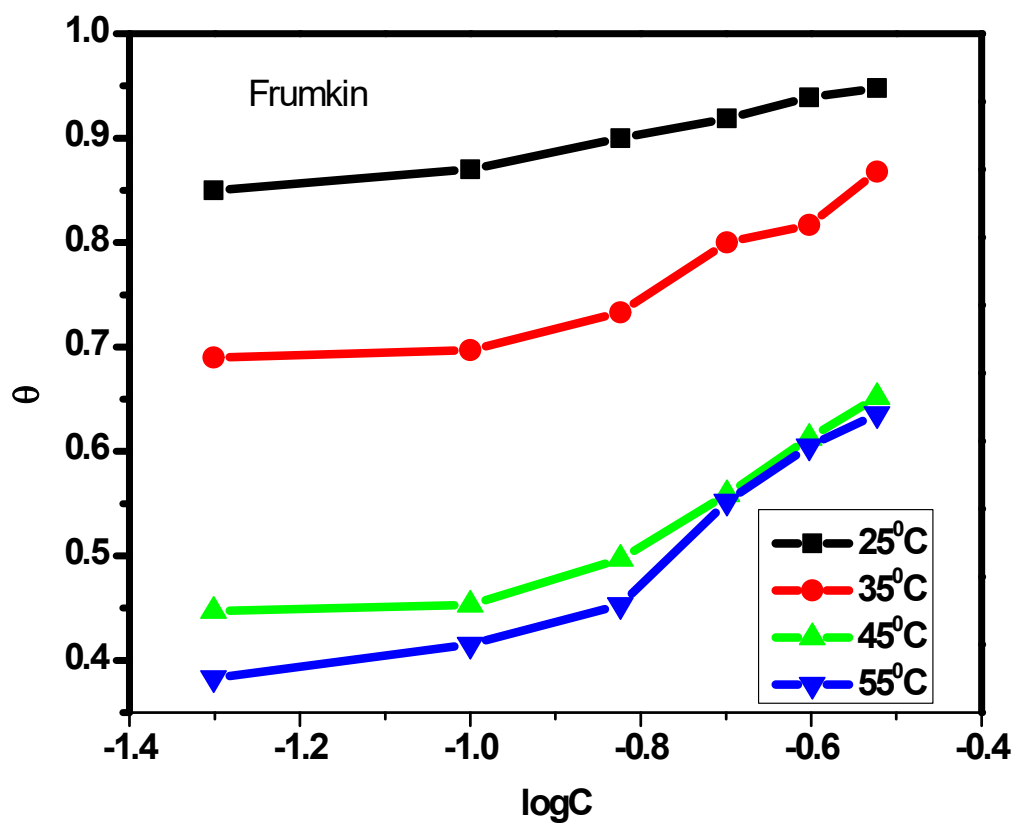

Fig. S10. Frumkin adsorption isotherm plotted as  $\theta$  vs.  $\log C$  of eruca sativa seeds extract for corrosion of carbon steel in 1 M HCl solution at 25 °C.

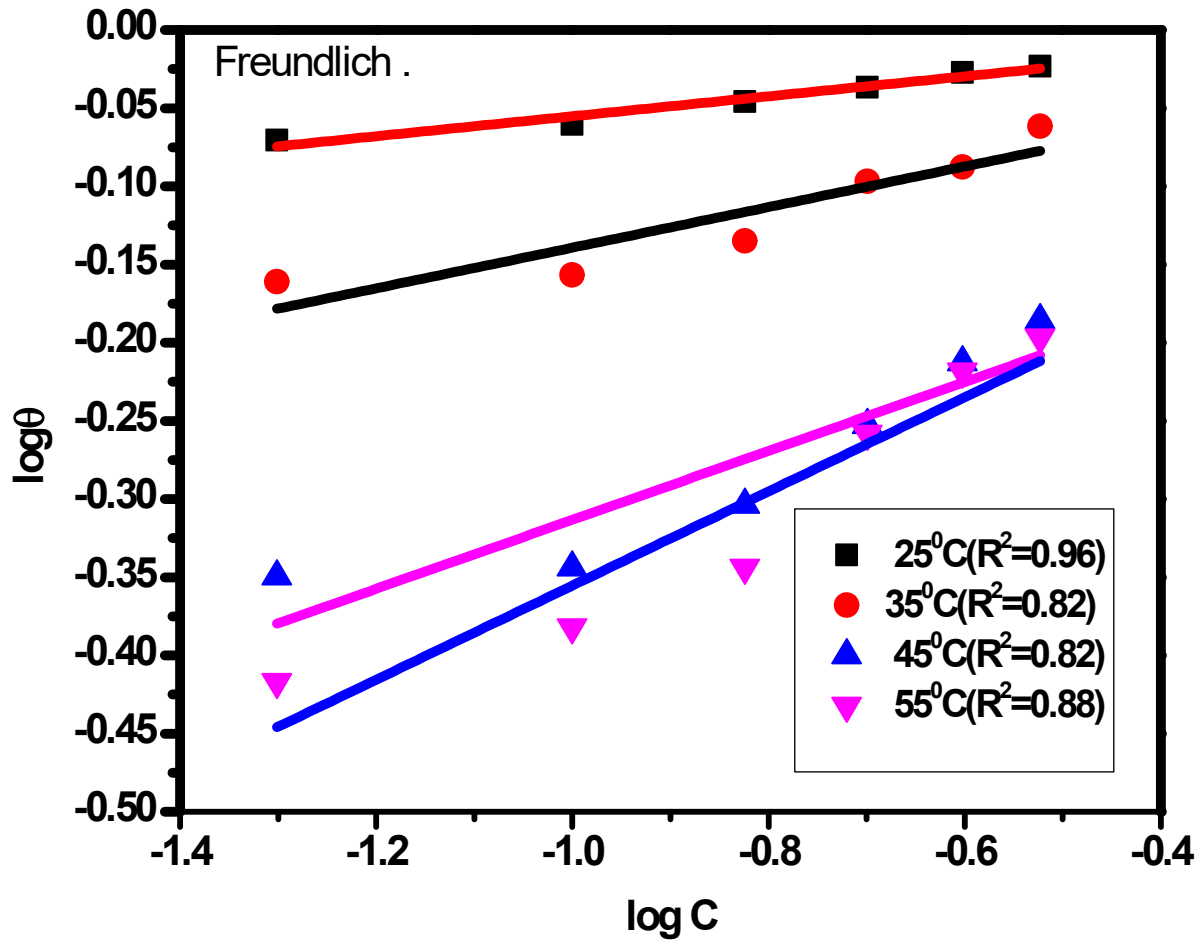

Fig. S11. Freundlich adsorption isotherm plotted as log  $\theta$  vs. log C of eruca sativa seeds extract for corrosion of carbon steel in 1 M HCl solution at 25 °C.

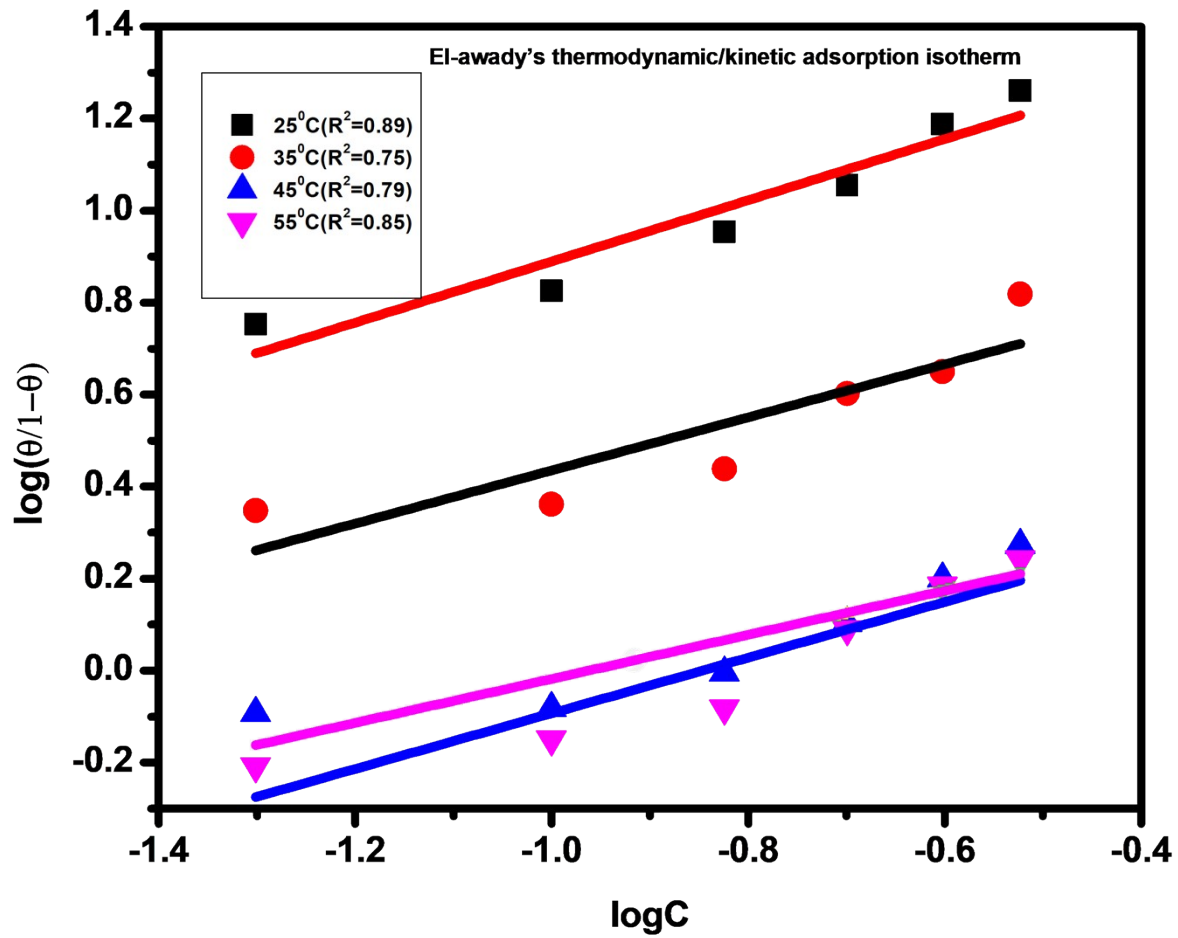

Fig. S12. Elawady s adsorption isotherm plotted as  $\log(\theta/1-\theta)$  vs.  $\log C$  of eruca sativa seeds extract for corrosion of carbon steel in 1 M HCl solution at 25 °C.

## TableS3

### Quercetin(neutral)

Fukui Indices for Nucleophilic Attack (Fukui(+))

| atom   | Mulliken | Hirshfeld |
|--------|----------|-----------|
| C ( 1) | 0.104    | 0.078     |
| C ( 2) | 0.026    | 0.046     |
| O ( 3) | 0.029    | 0.032     |
| C ( 4) | 0.112    | 0.096     |
| O ( 5) | 0.120    | 0.121     |
| C ( 6) | 0.005    | 0.024     |
| C ( 7) | 0.050    | 0.040     |
| O ( 8) | 0.027    | 0.031     |
| C ( 9) | 0.028    | 0.032     |
| C (10) | 0.031    | 0.038     |
| O (11) | 0.028    | 0.030     |
| C (12) | 0.034    | 0.032     |
| C (13) | 0.021    | 0.026     |
| O (14) | 0.039    | 0.049     |
| C (15) | 0.007    | 0.020     |
| C (16) | 0.028    | 0.027     |
| C (17) | 0.014    | 0.017     |
| O (18) | 0.022    | 0.010     |
| C (19) | 0.024    | 0.031     |
| O (20) | 0.026    | 0.030     |
| C (21) | 0.018    | 0.022     |
| C (22) | 0.016    | 0.028     |
| H (23) | 0.020    | 0.015     |
| H (24) | 0.014    | 0.014     |
| H (25) | 0.028    | 0.017     |
| H (26) | 0.011    | 0.012     |
| H (27) | 0.029    | 0.019     |
| H (28) | 0.027    | 0.013     |
| H (29) | 0.003    | 0.003     |
| H (30) | 0.007    | 0.019     |
| H (31) | 0.021    | 0.013     |
| H (32) | 0.030    | 0.017     |

Mulliken atomic charges:

|        | charge | spin  |
|--------|--------|-------|
| C ( 1) | 0.264  | 0.000 |
| C ( 2) | 0.223  | 0.000 |
| O ( 3) | -0.503 | 0.000 |
| C ( 4) | 0.316  | 0.000 |
| O ( 5) | -0.578 | 0.000 |
| C ( 6) | -0.058 | 0.000 |
| C ( 7) | 0.318  | 0.000 |
| O ( 8) | -0.468 | 0.000 |
| C ( 9) | -0.171 | 0.000 |
| C (10) | 0.354  | 0.000 |
| O (11) | -0.478 | 0.000 |
| C (12) | -0.177 | 0.000 |
| C (13) | 0.330  | 0.000 |
| O (14) | -0.494 | 0.000 |
| C (15) | 0.014  | 0.000 |

|         |        |       |
|---------|--------|-------|
| C ( 16) | -0.085 | 0.000 |
| C ( 17) | 0.283  | 0.000 |
| O ( 18) | -0.545 | 0.000 |
| C ( 19) | 0.308  | 0.000 |
| O ( 20) | -0.484 | 0.000 |
| C ( 21) | -0.084 | 0.000 |
| C ( 22) | -0.080 | 0.000 |
| H ( 23) | 0.272  | 0.000 |
| H ( 24) | 0.285  | 0.000 |
| H ( 25) | 0.062  | 0.000 |
| H ( 26) | 0.291  | 0.000 |
| H ( 27) | 0.052  | 0.000 |
| H ( 28) | 0.049  | 0.000 |
| H ( 29) | 0.303  | 0.000 |
| H ( 30) | 0.286  | 0.000 |
| H ( 31) | 0.050  | 0.000 |
| H ( 32) | 0.049  | 0.000 |

#### Fukui Indices for Electrophilic Attack (Fukui(-))

| atom    | Mulliken | Hirshfeld |
|---------|----------|-----------|
| C ( 1)  | 0.053    | 0.063     |
| C ( 2)  | 0.087    | 0.081     |
| O ( 3)  | 0.102    | 0.096     |
| C ( 4)  | 0.026    | 0.030     |
| O ( 5)  | 0.065    | 0.061     |
| C ( 6)  | 0.020    | 0.020     |
| C ( 7)  | 0.032    | 0.033     |
| O ( 8)  | 0.035    | 0.037     |
| C ( 9)  | 0.034    | 0.033     |
| C ( 10) | 0.019    | 0.030     |
| O ( 11) | 0.028    | 0.029     |
| C ( 12) | 0.058    | 0.058     |
| C ( 13) | 0.014    | 0.019     |
| O ( 14) | 0.046    | 0.046     |
| C ( 15) | 0.002    | 0.023     |
| C ( 16) | 0.033    | 0.028     |
| C ( 17) | 0.018    | 0.023     |
| O ( 18) | 0.001    | 0.016     |
| C ( 19) | 0.041    | 0.035     |
| O ( 20) | 0.037    | 0.033     |
| C ( 21) | 0.019    | 0.026     |
| C ( 22) | 0.028    | 0.025     |
| H ( 23) | 0.025    | 0.030     |
| H ( 24) | 0.015    | 0.016     |
| H ( 25) | 0.026    | 0.017     |
| H ( 26) | 0.011    | 0.012     |
| H ( 27) | 0.036    | 0.023     |
| H ( 28) | 0.023    | 0.017     |
| H ( 29) | 0.012    | 0.012     |
| H ( 30) | 0.013    | 0.002     |
| H ( 31) | 0.023    | 0.015     |
| H ( 32) | 0.020    | 0.012     |

### Quercetin(protonated)

#### Fukui Indices for Nucleophilic Attack (Fukui(+))

| atom    | Mulliken | Hirshfeld |
|---------|----------|-----------|
| C ( 1)  | 0.096    | 0.075     |
| C ( 2)  | 0.037    | 0.050     |
| O ( 3)  | 0.036    | 0.036     |
| C ( 4)  | 0.128    | 0.114     |
| O ( 5)  | 0.140    | 0.140     |
| C ( 6)  | 0.001    | 0.026     |
| C ( 7)  | 0.048    | 0.038     |
| O ( 8)  | 0.028    | 0.032     |
| C ( 9)  | 0.024    | 0.029     |
| C ( 10) | 0.040    | 0.046     |
| O ( 11) | 0.036    | 0.038     |
| C ( 12) | 0.030    | 0.031     |

|         |        |       |
|---------|--------|-------|
| C ( 13) | 0.043  | 0.034 |
| O ( 14) | 0.013  | 0.026 |
| C ( 15) | -0.009 | 0.011 |
| C ( 16) | 0.021  | 0.021 |
| C ( 17) | 0.014  | 0.015 |
| O ( 18) | 0.017  | 0.012 |
| C ( 19) | 0.020  | 0.023 |
| O ( 20) | 0.019  | 0.020 |
| C ( 21) | 0.014  | 0.018 |
| C ( 22) | 0.018  | 0.021 |
| H ( 23) | 0.017  | 0.016 |
| H ( 24) | 0.015  | 0.015 |
| H ( 25) | 0.027  | 0.017 |
| H ( 26) | 0.013  | 0.014 |
| H ( 27) | 0.028  | 0.018 |
| H ( 28) | 0.019  | 0.018 |
| H ( 29) | 0.021  | 0.012 |
| H ( 30) | 0.004  | 0.005 |
| H ( 31) | 0.003  | 0.008 |
| H ( 32) | 0.017  | 0.011 |
| H ( 33) | 0.022  | 0.012 |

Mulliken atomic charges:

|         | charge | spin  |
|---------|--------|-------|
| C ( 1)  | 0.250  | 0.000 |
| C ( 2)  | 0.276  | 0.000 |
| O ( 3)  | -0.464 | 0.000 |
| C ( 4)  | 0.338  | 0.000 |
| O ( 5)  | -0.498 | 0.000 |
| C ( 6)  | -0.032 | 0.000 |
| C ( 7)  | 0.337  | 0.000 |
| O ( 8)  | -0.444 | 0.000 |
| C ( 9)  | -0.146 | 0.000 |
| C ( 10) | 0.365  | 0.000 |
| O ( 11) | -0.450 | 0.000 |
| C ( 12) | -0.152 | 0.000 |
| C ( 13) | 0.351  | 0.000 |
| O ( 14) | -0.429 | 0.000 |
| C ( 15) | -0.014 | 0.000 |
| C ( 16) | -0.077 | 0.000 |
| C ( 17) | 0.295  | 0.000 |
| O ( 18) | -0.523 | 0.000 |
| C ( 19) | 0.314  | 0.000 |
| O ( 20) | -0.469 | 0.000 |
| C ( 21) | -0.070 | 0.000 |
| C ( 22) | -0.055 | 0.000 |
| H ( 23) | 0.286  | 0.000 |
| H ( 24) | 0.297  | 0.000 |
| H ( 25) | 0.081  | 0.000 |
| H ( 26) | 0.301  | 0.000 |
| H ( 27) | 0.092  | 0.000 |
| H ( 28) | 0.367  | 0.000 |
| H ( 29) | 0.064  | 0.000 |
| H ( 30) | 0.302  | 0.000 |
| H ( 31) | 0.292  | 0.000 |
| H ( 32) | 0.060  | 0.000 |
| H ( 33) | 0.057  | 0.000 |

Fukui Indices for Electrophilic Attack (Fukui(-))

| atom   | Mulliken | Hirshfeld |
|--------|----------|-----------|
| C ( 1) | 0.044    | 0.038     |
| C ( 2) | 0.050    | 0.051     |
| O ( 3) | 0.064    | 0.062     |
| C ( 4) | 0.015    | 0.016     |
| O ( 5) | 0.036    | 0.035     |
| C ( 6) | 0.015    | 0.016     |
| C ( 7) | 0.014    | 0.015     |
| O ( 8) | 0.017    | 0.018     |
| C ( 9) | 0.014    | 0.012     |



|         |       |       |
|---------|-------|-------|
| C ( 10) | 0.010 | 0.015 |
| O ( 11) | 0.018 | 0.018 |
| C ( 12) | 0.024 | 0.024 |
| C ( 13) | 0.006 | 0.009 |
| O ( 14) | 0.000 | 0.013 |
| C ( 15) | 0.040 | 0.061 |
| C ( 16) | 0.040 | 0.037 |
| C ( 17) | 0.051 | 0.056 |
| O ( 18) | 0.041 | 0.046 |
| C ( 19) | 0.060 | 0.069 |
| O ( 20) | 0.099 | 0.094 |
| C ( 21) | 0.045 | 0.051 |
| C ( 22) | 0.043 | 0.049 |
| H ( 23) | 0.023 | 0.024 |
| H ( 24) | 0.008 | 0.008 |
| H ( 25) | 0.011 | 0.007 |
| H ( 26) | 0.006 | 0.007 |
| H ( 27) | 0.016 | 0.010 |
| H ( 28) | 0.019 | 0.013 |
| H ( 29) | 0.037 | 0.023 |
| H ( 30) | 0.022 | 0.022 |
| H ( 31) | 0.031 | 0.029 |
| H ( 32) | 0.041 | 0.027 |
| H ( 33) | 0.039 | 0.025 |

**Table S4**

## **Isorhamnetin(neutral)**

Fukui Indices for Nucleophilic Attack (Fukui(+))

| atom    | Mulliken | Hirshfeld |
|---------|----------|-----------|
| C ( 1)  | 0.090    | 0.078     |
| C ( 2)  | 0.035    | 0.045     |
| C ( 3)  | 0.109    | 0.096     |
| C ( 4)  | 0.007    | 0.024     |
| C ( 5)  | 0.051    | 0.040     |
| C ( 6)  | 0.029    | 0.033     |
| C ( 7)  | 0.032    | 0.039     |
| C ( 8)  | 0.033    | 0.032     |
| C ( 9)  | 0.023    | 0.025     |
| O ( 10) | 0.040    | 0.044     |
| O ( 11) | 0.124    | 0.122     |
| C ( 12) | 0.001    | 0.020     |
| C ( 13) | 0.036    | 0.028     |
| C ( 14) | 0.013    | 0.018     |
| C ( 15) | 0.034    | 0.035     |
| C ( 16) | 0.017    | 0.022     |
| C ( 17) | 0.026    | 0.030     |
| O ( 18) | 0.013    | 0.007     |
| C ( 19) | -0.007   | 0.004     |
| O ( 20) | 0.025    | 0.028     |
| O ( 21) | 0.029    | 0.030     |
| O ( 22) | 0.028    | 0.031     |
| O ( 23) | 0.031    | 0.031     |
| H ( 24) | 0.026    | 0.017     |
| H ( 25) | 0.028    | 0.018     |
| H ( 26) | 0.020    | 0.013     |
| H ( 27) | 0.020    | 0.012     |
| H ( 28) | 0.026    | 0.017     |
| H ( 29) | 0.007    | 0.003     |
| H ( 30) | 0.005    | 0.004     |
| H ( 31) | 0.005    | 0.003     |
| H ( 32) | 0.009    | 0.016     |
| H ( 33) | 0.010    | 0.012     |

|         |       |       |
|---------|-------|-------|
| H ( 34) | 0.012 | 0.014 |
| H ( 35) | 0.013 | 0.012 |

Mulliken atomic charges:

|        | charge | spin  |
|--------|--------|-------|
| C ( 1) | 0.266  | 0.000 |
| C ( 2) | 0.219  | 0.000 |
| C ( 3) | 0.315  | 0.000 |
| C ( 4) | -0.059 | 0.000 |
| C ( 5) | 0.317  | 0.000 |
| C ( 6) | -0.171 | 0.000 |
| C ( 7) | 0.355  | 0.000 |
| C ( 8) | -0.177 | 0.000 |
| C ( 9) | 0.329  | 0.000 |
| O (10) | -0.496 | 0.000 |
| O (11) | -0.580 | 0.000 |
| C (12) | 0.016  | 0.000 |
| C (13) | -0.132 | 0.000 |
| C (14) | 0.326  | 0.000 |
| C (15) | 0.296  | 0.000 |
| C (16) | -0.087 | 0.000 |
| C (17) | -0.098 | 0.000 |
| O (18) | -0.562 | 0.000 |
| C (19) | 0.189  | 0.000 |
| O (20) | -0.490 | 0.000 |
| O (21) | -0.479 | 0.000 |
| O (22) | -0.468 | 0.000 |
| O (23) | -0.504 | 0.000 |
| H (24) | 0.061  | 0.000 |
| H (25) | 0.052  | 0.000 |
| H (26) | 0.058  | 0.000 |
| H (27) | 0.048  | 0.000 |
| H (28) | 0.048  | 0.000 |
| H (29) | 0.055  | 0.000 |
| H (30) | 0.055  | 0.000 |
| H (31) | 0.057  | 0.000 |
| H (32) | 0.297  | 0.000 |
| H (33) | 0.290  | 0.000 |
| H (34) | 0.286  | 0.000 |
| H (35) | 0.269  | 0.000 |

Fukui Indices for Electrophilic Attack (Fukui(-))

| atom   | Mulliken | Hirshfeld |
|--------|----------|-----------|
| C ( 1) | 0.055    | 0.051     |
| C ( 2) | 0.069    | 0.073     |
| C ( 3) | 0.025    | 0.026     |
| C ( 4) | 0.014    | 0.017     |
| C ( 5) | 0.023    | 0.023     |
| C ( 6) | 0.023    | 0.023     |
| C ( 7) | 0.016    | 0.023     |
| C ( 8) | 0.041    | 0.040     |
| C ( 9) | 0.009    | 0.015     |
| O (10) | 0.030    | 0.038     |
| O (11) | 0.055    | 0.054     |
| C (12) | 0.022    | 0.035     |
| C (13) | 0.024    | 0.025     |
| C (14) | 0.031    | 0.032     |
| C (15) | 0.046    | 0.048     |
| C (16) | 0.026    | 0.034     |
| C (17) | 0.032    | 0.040     |
| O (18) | 0.024    | 0.035     |
| C (19) | -0.006   | 0.010     |
| O (20) | 0.057    | 0.054     |
| O (21) | 0.021    | 0.022     |
| O (22) | 0.022    | 0.025     |
| O (23) | 0.088    | 0.086     |
| H (24) | 0.020    | 0.012     |
| H (25) | 0.028    | 0.017     |
| H (26) | 0.029    | 0.016     |

|         |       |       |
|---------|-------|-------|
| H ( 27) | 0.032 | 0.021 |
| H ( 28) | 0.033 | 0.018 |
| H ( 29) | 0.013 | 0.009 |
| H ( 30) | 0.015 | 0.008 |
| H ( 31) | 0.012 | 0.008 |
| H ( 32) | 0.017 | 0.012 |
| H ( 33) | 0.009 | 0.009 |
| H ( 34) | 0.014 | 0.012 |
| H ( 35) | 0.031 | 0.031 |

## Isorhamnetin(protonated)

Fukui Indices for Nucleophilic Attack (Fukui(+))

| atom    | Mulliken | Hirshfeld |
|---------|----------|-----------|
| C ( 1)  | 0.096    | 0.075     |
| C ( 2)  | 0.034    | 0.048     |
| C ( 3)  | 0.126    | 0.112     |
| C ( 4)  | 0.001    | 0.025     |
| C ( 5)  | 0.047    | 0.037     |
| C ( 6)  | 0.024    | 0.028     |
| C ( 7)  | 0.039    | 0.045     |
| C ( 8)  | 0.031    | 0.031     |
| C ( 9)  | 0.045    | 0.035     |
| O ( 10) | 0.011    | 0.026     |
| O ( 11) | 0.136    | 0.137     |
| C ( 12) | -0.010   | 0.012     |
| C ( 13) | 0.025    | 0.020     |
| C ( 14) | 0.012    | 0.013     |
| C ( 15) | 0.026    | 0.026     |
| C ( 16) | 0.012    | 0.018     |
| C ( 17) | 0.024    | 0.024     |
| O ( 18) | 0.007    | 0.010     |
| C ( 19) | -0.004   | 0.003     |
| O ( 20) | 0.022    | 0.022     |
| O ( 21) | 0.036    | 0.037     |
| O ( 22) | 0.027    | 0.031     |
| O ( 23) | 0.034    | 0.033     |
| H ( 24) | 0.026    | 0.016     |
| H ( 25) | 0.027    | 0.018     |
| H ( 26) | 0.025    | 0.021     |
| H ( 27) | 0.018    | 0.010     |
| H ( 28) | 0.017    | 0.011     |
| H ( 29) | 0.021    | 0.013     |
| H ( 30) | 0.005    | 0.003     |
| H ( 31) | 0.006    | 0.003     |
| H ( 32) | 0.005    | 0.003     |
| H ( 33) | 0.008    | 0.008     |
| H ( 34) | 0.013    | 0.014     |
| H ( 35) | 0.015    | 0.015     |

Mulliken atomic charges:

|         | charge | spin  |
|---------|--------|-------|
| C ( 1)  | 0.250  | 0.000 |
| C ( 2)  | 0.270  | 0.000 |
| C ( 3)  | 0.338  | 0.000 |
| C ( 4)  | -0.031 | 0.000 |
| C ( 5)  | 0.337  | 0.000 |
| C ( 6)  | -0.144 | 0.000 |
| C ( 7)  | 0.366  | 0.000 |
| C ( 8)  | -0.151 | 0.000 |
| C ( 9)  | 0.345  | 0.000 |
| O ( 10) | -0.432 | 0.000 |
| O ( 11) | -0.500 | 0.000 |
| C ( 12) | -0.010 | 0.000 |
| C ( 13) | -0.123 | 0.000 |

|         |        |       |
|---------|--------|-------|
| C ( 14) | 0.334  | 0.000 |
| C ( 15) | 0.311  | 0.000 |
| C ( 16) | -0.076 | 0.000 |
| C ( 17) | -0.069 | 0.000 |
| O ( 18) | -0.555 | 0.000 |
| C ( 19) | 0.186  | 0.000 |
| O ( 20) | -0.472 | 0.000 |
| O ( 21) | -0.451 | 0.000 |
| O ( 22) | -0.444 | 0.000 |
| O ( 23) | -0.465 | 0.000 |
| H ( 24) | 0.080  | 0.000 |
| H ( 25) | 0.092  | 0.000 |
| H ( 26) | 0.367  | 0.000 |
| H ( 27) | 0.070  | 0.000 |
| H ( 28) | 0.058  | 0.000 |
| H ( 29) | 0.056  | 0.000 |
| H ( 30) | 0.060  | 0.000 |
| H ( 31) | 0.058  | 0.000 |
| H ( 32) | 0.061  | 0.000 |
| H ( 33) | 0.303  | 0.000 |
| H ( 34) | 0.300  | 0.000 |
| H ( 35) | 0.296  | 0.000 |
| H ( 36) | 0.283  | 0.000 |

Fukui Indices for Electrophilic Attack (Fukui(-))

| atom    | Mulliken | Hirshfeld |
|---------|----------|-----------|
| C ( 1)  | 0.029    | 0.023     |
| C ( 2)  | 0.044    | 0.042     |
| C ( 3)  | 0.013    | 0.014     |
| C ( 4)  | 0.008    | 0.009     |
| C ( 5)  | 0.010    | 0.009     |
| C ( 6)  | 0.009    | 0.008     |
| C ( 7)  | 0.008    | 0.010     |
| C ( 8)  | 0.011    | 0.011     |
| C ( 9)  | 0.001    | 0.005     |
| O ( 10) | -0.002   | 0.009     |
| O ( 11) | 0.032    | 0.030     |
| C ( 12) | 0.041    | 0.061     |
| C ( 13) | 0.045    | 0.042     |
| C ( 14) | 0.060    | 0.065     |
| C ( 15) | 0.063    | 0.073     |
| C ( 16) | 0.045    | 0.051     |
| C ( 17) | 0.052    | 0.063     |
| O ( 18) | 0.079    | 0.079     |
| C ( 19) | -0.016   | 0.021     |
| O ( 20) | 0.098    | 0.093     |
| O ( 21) | 0.010    | 0.011     |
| O ( 22) | 0.009    | 0.010     |
| O ( 23) | 0.048    | 0.048     |
| H ( 24) | 0.008    | 0.005     |
| H ( 25) | 0.011    | 0.006     |
| H ( 26) | 0.011    | 0.007     |
| H ( 27) | 0.040    | 0.024     |
| H ( 28) | 0.044    | 0.028     |
| H ( 29) | 0.046    | 0.029     |
| H ( 30) | 0.032    | 0.020     |
| H ( 31) | 0.031    | 0.019     |
| H ( 32) | 0.024    | 0.015     |
| H ( 33) | 0.028    | 0.031     |
| H ( 34) | 0.004    | 0.004     |
| H ( 35) | 0.004    | 0.005     |
| H ( 36) | 0.021    | 0.020     |

**TableS5**

# ASCROBIC ACID (NEUTRAL)

## Fukui Indices for Nucleophilic Attack (Fukui(+))

| atom    | Mulliken | Hirshfeld |
|---------|----------|-----------|
| O ( 1)  | 0.062    | 0.069     |
| C ( 2)  | -0.030   | 0.027     |
| C ( 3)  | 0.166    | 0.130     |
| C ( 4)  | 0.065    | 0.081     |
| C ( 5)  | 0.176    | 0.156     |
| O ( 6)  | 0.181    | 0.183     |
| O ( 7)  | 0.053    | 0.055     |
| O ( 8)  | 0.075    | 0.083     |
| C ( 9)  | -0.006   | 0.015     |
| C ( 10) | -0.006   | 0.008     |
| O ( 11) | 0.011    | 0.011     |
| O ( 12) | 0.026    | 0.023     |
| H ( 13) | 0.084    | 0.049     |
| H ( 14) | 0.022    | 0.023     |
| H ( 15) | 0.031    | 0.033     |
| H ( 16) | 0.032    | 0.015     |
| H ( 17) | 0.019    | 0.013     |
| H ( 18) | 0.018    | 0.009     |
| H ( 19) | 0.009    | 0.006     |
| H ( 20) | 0.009    | 0.011     |

## Mulliken atomic charges:

| atom    | charge | spin  |
|---------|--------|-------|
| O ( 1)  | -0.542 | 0.000 |
| C ( 2)  | 0.195  | 0.000 |
| C ( 3)  | 0.260  | 0.000 |
| C ( 4)  | 0.215  | 0.000 |
| C ( 5)  | 0.536  | 0.000 |
| O ( 6)  | -0.524 | 0.000 |
| O ( 7)  | -0.500 | 0.000 |
| O ( 8)  | -0.466 | 0.000 |
| C ( 9)  | 0.217  | 0.000 |
| C ( 10) | 0.234  | 0.000 |
| O ( 11) | -0.561 | 0.000 |
| O ( 12) | -0.530 | 0.000 |
| H ( 13) | 0.079  | 0.000 |
| H ( 14) | 0.294  | 0.000 |
| H ( 15) | 0.303  | 0.000 |
| H ( 16) | 0.041  | 0.000 |
| H ( 17) | 0.048  | 0.000 |
| H ( 18) | 0.034  | 0.000 |
| H ( 19) | 0.282  | 0.000 |
| H ( 20) | 0.284  | 0.000 |

## Fukui Indices for Electrophilic Attack (Fukui(-))

| atom    | Mulliken | Hirshfeld |
|---------|----------|-----------|
| O ( 1)  | 0.043    | 0.042     |
| C ( 2)  | -0.019   | 0.021     |
| C ( 3)  | 0.122    | 0.117     |
| C ( 4)  | 0.133    | 0.138     |
| C ( 5)  | 0.054    | 0.051     |
| O ( 6)  | 0.103    | 0.099     |
| O ( 7)  | 0.178    | 0.168     |
| O ( 8)  | 0.122    | 0.119     |
| C ( 9)  | -0.005   | 0.012     |
| C ( 10) | -0.002   | 0.009     |
| O ( 11) | 0.017    | 0.017     |
| O ( 12) | 0.028    | 0.025     |
| H ( 13) | 0.058    | 0.034     |
| H ( 14) | 0.049    | 0.057     |

|         |       |       |
|---------|-------|-------|
| H ( 15) | 0.038 | 0.043 |
| H ( 16) | 0.029 | 0.014 |
| H ( 17) | 0.018 | 0.010 |
| H ( 18) | 0.014 | 0.008 |
| H ( 19) | 0.007 | 0.008 |
| H ( 20) | 0.012 | 0.010 |

## ASCROBIC ACID (PROTONATED)

Fukui Indices for Nucleophilic Attack (Fukui(+))

| atom    | Mulliken | Hirshfeld |
|---------|----------|-----------|
| o ( 1)  | 0.076    | 0.082     |
| c ( 2)  | -0.015   | 0.030     |
| c ( 3)  | 0.143    | 0.126     |
| c ( 4)  | 0.054    | 0.066     |
| c ( 5)  | 0.170    | 0.151     |
| o ( 6)  | 0.106    | 0.110     |
| o ( 7)  | 0.080    | 0.063     |
| o ( 8)  | 0.094    | 0.098     |
| c ( 9)  | 0.000    | 0.019     |
| c ( 10) | -0.012   | 0.010     |
| o ( 11) | 0.016    | 0.017     |
| o ( 12) | 0.028    | 0.023     |
| H ( 13) | 0.081    | 0.050     |
| H ( 14) | 0.035    | 0.038     |
| H ( 15) | 0.013    | 0.021     |
| H ( 16) | 0.030    | 0.040     |
| H ( 17) | 0.040    | 0.019     |
| H ( 18) | 0.020    | 0.015     |
| H ( 19) | 0.020    | 0.012     |
| H ( 20) | 0.010    | 0.003     |
| H ( 21) | 0.012    | 0.011     |

Mulliken atomic charges:  
charge spin

|        |        |       |
|--------|--------|-------|
| o ( 1) | -0.445 | 0.000 |
| c ( 2) | 0.181  | 0.000 |
| c ( 3) | 0.322  | 0.000 |
| c ( 4) | 0.251  | 0.000 |
| c ( 5) | 0.621  | 0.000 |

|        |        |       |
|--------|--------|-------|
| O ( 6) | -0.368 | 0.000 |
| O ( 7) | -0.513 | 0.000 |
| O ( 8) | -0.395 | 0.000 |
| C ( 9) | 0.217  | 0.000 |
| C (10) | 0.229  | 0.000 |
| O (11) | -0.544 | 0.000 |
| O (12) | -0.509 | 0.000 |
| H (13) | 0.125  | 0.000 |
| H (14) | 0.334  | 0.000 |
| H (15) | 0.321  | 0.000 |
| H (16) | 0.321  | 0.000 |
| H (17) | 0.065  | 0.000 |
| H (18) | 0.058  | 0.000 |
| H (19) | 0.048  | 0.000 |
| H (20) | 0.285  | 0.000 |
| H (21) | 0.295  | 0.000 |

#### Fukui Indices for Electrophilic Attack (Fukui(-))

| atom   | Mulliken | Hirshfeld |
|--------|----------|-----------|
| O ( 1) | 0.011    | 0.010     |
| C ( 2) | -0.007   | 0.014     |
| C ( 3) | 0.046    | 0.025     |
| C ( 4) | 0.026    | 0.029     |
| C ( 5) | 0.026    | 0.020     |
| O ( 6) | 0.026    | 0.026     |
| O ( 7) | -0.014   | 0.004     |
| O ( 8) | 0.019    | 0.022     |
| C ( 9) | -0.018   | 0.042     |
| C (10) | -0.016   | 0.061     |
| O (11) | 0.341    | 0.303     |
| O (12) | 0.142    | 0.128     |
| H (13) | 0.035    | 0.019     |
| H (14) | 0.007    | 0.010     |
| H (15) | 0.020    | 0.013     |
| H (16) | 0.015    | 0.008     |
| H (17) | 0.060    | 0.031     |
| H (18) | 0.085    | 0.048     |
| H (19) | 0.093    | 0.057     |
| H (20) | 0.066    | 0.085     |
| H (21) | 0.038    | 0.043     |

## Table S6

### Erucic acid (neutral)

#### Fukui Indices for Nucleophilic Attack (Fukui(+))

| atom   | Mulliken | Hirshfeld |
|--------|----------|-----------|
| C ( 1) | 0.287    | 0.254     |
| C ( 2) | -0.038   | 0.046     |
| C ( 3) | -0.022   | 0.027     |
| C ( 4) | -0.014   | 0.005     |
| C ( 5) | -0.003   | 0.005     |
| C ( 6) | -0.004   | 0.002     |
| C ( 7) | 0.001    | 0.001     |
| C ( 8) | -0.003   | 0.000     |
| C ( 9) | 0.002    | 0.001     |
| C (10) | 0.001    | 0.000     |
| C (11) | -0.002   | -0.001    |
| C (12) | 0.001    | 0.000     |
| C (13) | -0.005   | 0.001     |
| C (14) | 0.004    | 0.000     |
| C (15) | 0.002    | -0.001    |
| C (16) | 0.000    | 0.000     |
| C (17) | -0.001   | -0.001    |
| C (18) | -0.001   | 0.000     |

|         |        |        |
|---------|--------|--------|
| C ( 19) | -0.003 | 0.000  |
| C ( 20) | -0.001 | 0.000  |
| C ( 21) | -0.002 | -0.001 |
| C ( 22) | 0.000  | 0.000  |
| O ( 23) | 0.255  | 0.262  |
| O ( 24) | 0.129  | 0.138  |
| H ( 25) | 0.106  | 0.066  |
| H ( 26) | 0.072  | 0.038  |
| H ( 27) | 0.034  | 0.021  |
| H ( 28) | 0.059  | 0.033  |
| H ( 29) | 0.023  | 0.011  |
| H ( 30) | 0.013  | 0.009  |
| H ( 31) | 0.010  | 0.006  |
| H ( 32) | 0.011  | 0.005  |
| H ( 33) | 0.005  | 0.003  |
| H ( 34) | 0.005  | 0.003  |
| H ( 35) | 0.003  | 0.002  |
| H ( 36) | 0.002  | 0.001  |
| H ( 37) | 0.003  | 0.003  |
| H ( 38) | 0.000  | -0.002 |
| H ( 39) | 0.000  | 0.002  |
| H ( 40) | -0.001 | -0.002 |
| H ( 41) | 0.002  | 0.002  |
| H ( 42) | 0.000  | -0.001 |
| H ( 43) | -0.002 | 0.000  |
| H ( 44) | -0.002 | -0.003 |
| H ( 45) | -0.001 | 0.000  |
| H ( 46) | -0.001 | -0.003 |
| H ( 47) | 0.001  | 0.002  |
| H ( 48) | 0.002  | 0.001  |
| H ( 49) | 0.000  | 0.001  |
| H ( 50) | 0.000  | 0.000  |
| H ( 51) | 0.000  | 0.000  |
| H ( 52) | 0.002  | 0.001  |
| H ( 53) | -0.002 | 0.000  |
| H ( 54) | 0.000  | 0.000  |
| H ( 55) | 0.002  | 0.000  |
| H ( 56) | 0.001  | 0.000  |
| H ( 57) | -0.001 | 0.001  |
| H ( 58) | 0.003  | 0.000  |
| H ( 59) | 0.000  | -0.002 |
| H ( 60) | 0.001  | 0.001  |
| H ( 61) | -0.002 | -0.001 |
| H ( 62) | 0.002  | 0.000  |
| H ( 63) | 0.001  | 0.001  |
| H ( 64) | 0.000  | 0.000  |
| H ( 65) | 0.000  | 0.001  |
| H ( 66) | 0.065  | 0.061  |

Mulliken atomic charges:  
charge spin

|         |        |       |
|---------|--------|-------|
| C ( 1)  | 0.528  | 0.000 |
| C ( 2)  | -0.092 | 0.000 |
| C ( 3)  | -0.037 | 0.000 |
| C ( 4)  | -0.032 | 0.000 |
| C ( 5)  | -0.030 | 0.000 |
| C ( 6)  | -0.032 | 0.000 |
| C ( 7)  | -0.033 | 0.000 |
| C ( 8)  | -0.032 | 0.000 |
| C ( 9)  | -0.034 | 0.000 |
| C ( 10) | -0.035 | 0.000 |
| C ( 11) | -0.028 | 0.000 |
| C ( 12) | -0.038 | 0.000 |
| C ( 13) | -0.035 | 0.000 |
| C ( 14) | -0.034 | 0.000 |
| C ( 15) | -0.041 | 0.000 |
| C ( 16) | -0.024 | 0.000 |
| C ( 17) | -0.033 | 0.000 |
| C ( 18) | -0.031 | 0.000 |
| C ( 19) | -0.029 | 0.000 |
| C ( 20) | -0.026 | 0.000 |



|         |        |       |
|---------|--------|-------|
| C ( 21) | -0.031 | 0.000 |
| C ( 22) | -0.065 | 0.000 |
| O ( 23) | -0.524 | 0.000 |
| O ( 24) | -0.450 | 0.000 |
| H ( 25) | 0.056  | 0.000 |
| H ( 26) | 0.047  | 0.000 |
| H ( 27) | 0.035  | 0.000 |
| H ( 28) | 0.029  | 0.000 |
| H ( 29) | 0.021  | 0.000 |
| H ( 30) | 0.025  | 0.000 |
| H ( 31) | 0.019  | 0.000 |
| H ( 32) | 0.018  | 0.000 |
| H ( 33) | 0.016  | 0.000 |
| H ( 34) | 0.020  | 0.000 |
| H ( 35) | 0.018  | 0.000 |
| H ( 36) | 0.014  | 0.000 |
| H ( 37) | 0.015  | 0.000 |
| H ( 38) | 0.019  | 0.000 |
| H ( 39) | 0.018  | 0.000 |
| H ( 40) | 0.015  | 0.000 |
| H ( 41) | 0.017  | 0.000 |
| H ( 42) | 0.021  | 0.000 |
| H ( 43) | 0.019  | 0.000 |
| H ( 44) | 0.018  | 0.000 |
| H ( 45) | 0.020  | 0.000 |
| H ( 46) | 0.037  | 0.000 |
| H ( 47) | 0.003  | 0.000 |
| H ( 48) | 0.003  | 0.000 |
| H ( 49) | 0.034  | 0.000 |
| H ( 50) | 0.019  | 0.000 |
| H ( 51) | 0.018  | 0.000 |
| H ( 52) | 0.019  | 0.000 |
| H ( 53) | 0.019  | 0.000 |
| H ( 54) | 0.017  | 0.000 |
| H ( 55) | 0.015  | 0.000 |
| H ( 56) | 0.017  | 0.000 |
| H ( 57) | 0.016  | 0.000 |
| H ( 58) | 0.015  | 0.000 |
| H ( 59) | 0.014  | 0.000 |
| H ( 60) | 0.015  | 0.000 |
| H ( 61) | 0.017  | 0.000 |
| H ( 62) | 0.016  | 0.000 |
| H ( 63) | 0.020  | 0.000 |
| H ( 64) | 0.020  | 0.000 |
| H ( 65) | 0.018  | 0.000 |
| H ( 66) | 0.283  | 0.000 |

#### Fukui Indices for Electrophilic Attack (Fukui(-))

| atom    | Mulliken | Hirshfeld |
|---------|----------|-----------|
| C ( 1)  | -0.001   | 0.000     |
| C ( 2)  | -0.002   | -0.001    |
| C ( 3)  | -0.001   | -0.001    |
| C ( 4)  | -0.002   | 0.000     |
| C ( 5)  | 0.000    | 0.000     |
| C ( 6)  | 0.002    | 0.001     |
| C ( 7)  | -0.002   | 0.001     |
| C ( 8)  | 0.001    | 0.002     |
| C ( 9)  | -0.005   | 0.004     |
| C ( 10) | -0.007   | 0.006     |
| C ( 11) | -0.006   | 0.019     |
| C ( 12) | -0.033   | 0.038     |
| C ( 13) | 0.180    | 0.206     |
| C ( 14) | 0.167    | 0.206     |
| C ( 15) | -0.034   | 0.038     |
| C ( 16) | -0.009   | 0.019     |
| C ( 17) | -0.004   | 0.008     |
| C ( 18) | -0.002   | 0.004     |
| C ( 19) | 0.002    | 0.003     |
| C ( 20) | 0.000    | 0.001     |

|         |        |        |
|---------|--------|--------|
| C ( 21) | 0.002  | 0.001  |
| C ( 22) | 0.000  | 0.000  |
| O ( 23) | 0.003  | 0.001  |
| O ( 24) | 0.001  | 0.004  |
| H ( 25) | 0.001  | 0.002  |
| H ( 26) | 0.000  | 0.000  |
| H ( 27) | 0.004  | -0.002 |
| H ( 28) | -0.002 | 0.000  |
| H ( 29) | 0.000  | -0.001 |
| H ( 30) | 0.001  | 0.000  |
| H ( 31) | 0.000  | -0.001 |
| H ( 32) | 0.000  | 0.001  |
| H ( 33) | 0.000  | 0.000  |
| H ( 34) | 0.000  | 0.000  |
| H ( 35) | 0.001  | 0.000  |
| H ( 36) | 0.002  | 0.001  |
| H ( 37) | 0.002  | -0.001 |
| H ( 38) | 0.004  | 0.004  |
| H ( 39) | 0.006  | 0.001  |
| H ( 40) | 0.008  | 0.006  |
| H ( 41) | 0.012  | 0.005  |
| H ( 42) | 0.014  | 0.009  |
| H ( 43) | 0.029  | 0.014  |
| H ( 44) | 0.037  | 0.021  |
| H ( 45) | 0.060  | 0.032  |
| H ( 46) | 0.090  | 0.062  |
| H ( 47) | 0.111  | 0.067  |
| H ( 48) | 0.111  | 0.069  |
| H ( 49) | 0.087  | 0.057  |
| H ( 50) | 0.057  | 0.030  |
| H ( 51) | 0.036  | 0.019  |
| H ( 52) | 0.028  | 0.014  |
| H ( 53) | 0.016  | 0.008  |
| H ( 54) | 0.014  | 0.007  |
| H ( 55) | 0.005  | 0.004  |
| H ( 56) | 0.007  | 0.004  |
| H ( 57) | 0.005  | 0.001  |
| H ( 58) | 0.001  | 0.002  |
| H ( 59) | 0.002  | 0.003  |
| H ( 60) | 0.001  | 0.000  |
| H ( 61) | 0.003  | 0.001  |
| H ( 62) | -0.001 | 0.000  |
| H ( 63) | 0.000  | 0.000  |
| H ( 64) | 0.000  | 0.000  |
| H ( 65) | 0.001  | 0.000  |
| H ( 66) | 0.001  | 0.001  |

## ERUCIC ACID (PROTONATED)

Fukui Indices for Nucleophilic Attack (Fukui(+))

| atom    | Mulliken | Hirshfeld |
|---------|----------|-----------|
| C ( 1)  | 0.395    | 0.313     |
| C ( 2)  | -0.038   | 0.070     |
| C ( 3)  | -0.016   | 0.052     |
| C ( 4)  | -0.015   | 0.009     |
| C ( 5)  | -0.006   | 0.007     |
| C ( 6)  | -0.003   | 0.004     |
| C ( 7)  | -0.001   | 0.002     |
| C ( 8)  | 0.000    | 0.001     |
| C ( 9)  | 0.000    | 0.001     |
| C ( 10) | 0.000    | 0.001     |
| C ( 11) | 0.000    | 0.000     |
| C ( 12) | 0.000    | 0.000     |
| C ( 13) | 0.000    | 0.000     |
| C ( 14) | 0.001    | 0.000     |
| C ( 15) | 0.000    | 0.000     |

|         |        |       |
|---------|--------|-------|
| C ( 16) | 0.000  | 0.000 |
| C ( 17) | 0.000  | 0.000 |
| C ( 18) | 0.000  | 0.000 |
| C ( 19) | 0.000  | 0.000 |
| C ( 20) | 0.000  | 0.000 |
| C ( 21) | 0.000  | 0.000 |
| C ( 22) | 0.000  | 0.000 |
| O ( 23) | 0.253  | 0.280 |
| O ( 24) | 0.000  | 0.000 |
| H ( 25) | 0.092  | 0.062 |
| H ( 26) | 0.101  | 0.069 |
| H ( 27) | 0.074  | 0.044 |
| H ( 28) | 0.059  | 0.032 |
| H ( 29) | 0.027  | 0.014 |
| H ( 30) | 0.028  | 0.013 |
| H ( 31) | 0.013  | 0.007 |
| H ( 32) | 0.013  | 0.007 |
| H ( 33) | 0.007  | 0.003 |
| H ( 34) | 0.006  | 0.003 |
| H ( 35) | 0.003  | 0.001 |
| H ( 36) | 0.003  | 0.001 |
| H ( 37) | 0.001  | 0.001 |
| H ( 38) | 0.001  | 0.001 |
| H ( 39) | 0.001  | 0.000 |
| H ( 40) | 0.001  | 0.000 |
| H ( 41) | 0.000  | 0.000 |
| H ( 42) | 0.000  | 0.000 |
| H ( 43) | 0.000  | 0.000 |
| H ( 44) | 0.000  | 0.000 |
| H ( 45) | 0.000  | 0.000 |
| H ( 46) | 0.000  | 0.000 |
| H ( 47) | 0.000  | 0.000 |
| H ( 48) | 0.000  | 0.000 |
| H ( 49) | -0.001 | 0.000 |
| H ( 50) | 0.000  | 0.000 |
| H ( 51) | 0.000  | 0.000 |
| H ( 52) | 0.000  | 0.000 |
| H ( 53) | 0.000  | 0.000 |
| H ( 54) | 0.000  | 0.000 |
| H ( 55) | 0.000  | 0.000 |
| H ( 56) | 0.000  | 0.000 |
| H ( 57) | 0.000  | 0.000 |
| H ( 58) | 0.000  | 0.000 |
| H ( 59) | 0.000  | 0.000 |
| H ( 60) | -0.001 | 0.000 |
| H ( 61) | 0.000  | 0.000 |
| H ( 62) | 0.000  | 0.000 |
| H ( 63) | 0.000  | 0.000 |
| H ( 64) | 0.000  | 0.000 |
| H ( 65) | 0.000  | 0.000 |
| H ( 66) | 0.000  | 0.000 |
| H ( 67) | 0.000  | 0.000 |

Mulliken atomic charges:  
charge spin

|         |        |       |
|---------|--------|-------|
| C ( 1)  | 0.579  | 0.000 |
| C ( 2)  | -0.149 | 0.000 |
| C ( 3)  | -0.041 | 0.000 |
| C ( 4)  | -0.043 | 0.000 |
| C ( 5)  | -0.033 | 0.000 |
| C ( 6)  | -0.034 | 0.000 |
| C ( 7)  | -0.032 | 0.000 |
| C ( 8)  | -0.032 | 0.000 |
| C ( 9)  | -0.031 | 0.000 |
| C ( 10) | -0.033 | 0.000 |
| C ( 11) | -0.015 | 0.000 |
| C ( 12) | -0.045 | 0.000 |

|         |        |       |
|---------|--------|-------|
| C ( 13) | -0.030 | 0.000 |
| C ( 14) | -0.033 | 0.000 |
| C ( 15) | -0.043 | 0.000 |
| C ( 16) | -0.014 | 0.000 |
| C ( 17) | -0.032 | 0.000 |
| C ( 18) | -0.030 | 0.000 |
| C ( 19) | -0.029 | 0.000 |
| C ( 20) | -0.025 | 0.000 |
| C ( 21) | -0.030 | 0.000 |
| C ( 22) | -0.065 | 0.000 |
| O ( 23) | -0.082 | 0.000 |
| O ( 24) | -0.555 | 0.000 |
| H ( 25) | 0.170  | 0.000 |
| H ( 26) | 0.173  | 0.000 |
| H ( 27) | 0.081  | 0.000 |
| H ( 28) | 0.078  | 0.000 |
| H ( 29) | 0.044  | 0.000 |
| H ( 30) | 0.045  | 0.000 |
| H ( 31) | 0.031  | 0.000 |
| H ( 32) | 0.029  | 0.000 |
| H ( 33) | 0.021  | 0.000 |
| H ( 34) | 0.022  | 0.000 |
| H ( 35) | 0.019  | 0.000 |
| H ( 36) | 0.018  | 0.000 |
| H ( 37) | 0.016  | 0.000 |
| H ( 38) | 0.017  | 0.000 |
| H ( 39) | 0.018  | 0.000 |
| H ( 40) | 0.016  | 0.000 |
| H ( 41) | 0.017  | 0.000 |
| H ( 42) | 0.018  | 0.000 |
| H ( 43) | 0.018  | 0.000 |
| H ( 44) | 0.017  | 0.000 |
| H ( 45) | 0.017  | 0.000 |
| H ( 46) | 0.030  | 0.000 |
| H ( 47) | 0.004  | 0.000 |
| H ( 48) | 0.003  | 0.000 |
| H ( 49) | 0.030  | 0.000 |
| H ( 50) | 0.017  | 0.000 |
| H ( 51) | 0.016  | 0.000 |
| H ( 52) | 0.017  | 0.000 |
| H ( 53) | 0.018  | 0.000 |
| H ( 54) | 0.017  | 0.000 |
| H ( 55) | 0.016  | 0.000 |
| H ( 56) | 0.016  | 0.000 |
| H ( 57) | 0.016  | 0.000 |
| H ( 58) | 0.016  | 0.000 |
| H ( 59) | 0.014  | 0.000 |
| H ( 60) | 0.015  | 0.000 |
| H ( 61) | 0.016  | 0.000 |
| H ( 62) | 0.016  | 0.000 |
| H ( 63) | 0.020  | 0.000 |
| H ( 64) | 0.020  | 0.000 |
| H ( 65) | 0.018  | 0.000 |
| H ( 66) | 0.277  | 0.000 |
| H ( 67) | 0.278  | 0.000 |

Fukui Indices for Electrophilic Attack (Fukui(-))

| atom    | Mulliken | Hirshfeld |
|---------|----------|-----------|
| C ( 1)  | 0.001    | 0.001     |
| C ( 2)  | -0.002   | 0.000     |
| C ( 3)  | 0.001    | 0.000     |
| C ( 4)  | 0.001    | 0.000     |
| C ( 5)  | -0.001   | 0.001     |
| C ( 6)  | 0.000    | 0.001     |
| C ( 7)  | -0.001   | 0.002     |
| C ( 8)  | -0.002   | 0.003     |
| C ( 9)  | -0.004   | 0.005     |
| C ( 10) | -0.004   | 0.009     |
| C ( 11) | -0.010   | 0.023     |

|         |        |        |
|---------|--------|--------|
| C ( 12) | -0.030 | 0.035  |
| C ( 13) | 0.166  | 0.201  |
| C ( 14) | 0.165  | 0.201  |
| C ( 15) | -0.030 | 0.035  |
| C ( 16) | -0.010 | 0.024  |
| C ( 17) | -0.005 | 0.010  |
| C ( 18) | -0.003 | 0.006  |
| C ( 19) | -0.002 | 0.003  |
| C ( 20) | -0.001 | 0.002  |
| C ( 21) | 0.000  | 0.001  |
| C ( 22) | 0.000  | 0.001  |
| O ( 23) | -0.001 | 0.000  |
| O ( 24) | 0.000  | 0.000  |
| H ( 25) | 0.004  | 0.002  |
| H ( 26) | 0.000  | 0.000  |
| H ( 27) | -0.001 | 0.000  |
| H ( 28) | -0.001 | -0.001 |
| H ( 29) | -0.003 | -0.001 |
| H ( 30) | 0.000  | 0.000  |
| H ( 31) | 0.002  | 0.001  |
| H ( 32) | 0.001  | 0.000  |
| H ( 33) | 0.001  | 0.001  |
| H ( 34) | 0.002  | 0.001  |
| H ( 35) | 0.003  | 0.002  |
| H ( 36) | 0.003  | 0.001  |
| H ( 37) | 0.005  | 0.002  |
| H ( 38) | 0.005  | 0.002  |
| H ( 39) | 0.008  | 0.005  |
| H ( 40) | 0.009  | 0.005  |
| H ( 41) | 0.016  | 0.008  |
| H ( 42) | 0.015  | 0.008  |
| H ( 43) | 0.033  | 0.017  |
| H ( 44) | 0.038  | 0.019  |
| H ( 45) | 0.054  | 0.028  |
| H ( 46) | 0.080  | 0.051  |
| H ( 47) | 0.112  | 0.068  |
| H ( 48) | 0.112  | 0.069  |
| H ( 49) | 0.081  | 0.051  |
| H ( 50) | 0.053  | 0.028  |
| H ( 51) | 0.039  | 0.019  |
| H ( 52) | 0.034  | 0.017  |
| H ( 53) | 0.016  | 0.008  |
| H ( 54) | 0.016  | 0.008  |
| H ( 55) | 0.009  | 0.005  |
| H ( 56) | 0.009  | 0.004  |
| H ( 57) | 0.005  | 0.002  |
| H ( 58) | 0.004  | 0.002  |
| H ( 59) | 0.002  | 0.001  |
| H ( 60) | 0.003  | 0.001  |
| H ( 61) | 0.001  | 0.001  |
| H ( 62) | 0.001  | 0.001  |
| H ( 63) | 0.001  | 0.000  |
| H ( 64) | 0.001  | 0.000  |
| H ( 65) | 0.001  | 0.001  |
| H ( 66) | 0.000  | 0.000  |
| H ( 67) | 0.000  | 0.000  |

## TableS7

### OLEIC ACID(NEUTRAL)

Fukui Indices for Nucleophilic Attack (Fukui(+))

| atom   | Mulliken | Hirshfeld |
|--------|----------|-----------|
| C ( 1) | 0.292    | 0.263     |
| C ( 2) | -0.046   | 0.046     |
| C ( 3) | -0.027   | 0.010     |
| C ( 4) | -0.014   | 0.004     |
| C ( 5) | -0.001   | 0.003     |

|        |        |        |
|--------|--------|--------|
| C ( 6) | 0.002  | 0.002  |
| C ( 7) | -0.003 | 0.001  |
| C ( 8) | -0.005 | 0.001  |
| C ( 9) | -0.001 | 0.000  |
| C (10) | 0.009  | 0.001  |
| C (11) | -0.006 | 0.000  |
| C (12) | 0.000  | -0.002 |
| C (13) | 0.002  | 0.000  |
| C (14) | 0.002  | 0.000  |
| C (15) | -0.001 | 0.000  |
| C (16) | 0.002  | 0.000  |
| C (17) | 0.002  | 0.000  |
| C (18) | 0.002  | 0.000  |
| O (19) | 0.249  | 0.253  |
| O (20) | 0.144  | 0.155  |
| H (21) | 0.085  | 0.046  |
| H (22) | 0.127  | 0.085  |
| H (23) | 0.036  | 0.021  |
| H (24) | 0.035  | 0.018  |
| H (25) | 0.014  | 0.008  |
| H (26) | 0.022  | 0.011  |
| H (27) | 0.004  | 0.004  |
| H (28) | 0.008  | 0.005  |
| H (29) | 0.004  | 0.000  |
| H (30) | 0.005  | 0.002  |
| H (31) | 0.000  | 0.001  |
| H (32) | 0.002  | 0.002  |
| H (33) | 0.001  | 0.000  |
| H (34) | 0.002  | -0.001 |
| H (35) | 0.000  | -0.001 |
| H (36) | 0.000  | -0.001 |
| H (37) | 0.003  | 0.004  |
| H (38) | -0.002 | -0.002 |
| H (39) | -0.001 | 0.002  |
| H (40) | -0.006 | -0.005 |
| H (41) | 0.003  | 0.001  |
| H (42) | -0.002 | 0.000  |
| H (43) | -0.001 | 0.000  |
| H (44) | 0.000  | 0.000  |
| H (45) | 0.000  | -0.001 |
| H (46) | 0.000  | 0.001  |
| H (47) | -0.002 | 0.000  |
| H (48) | 0.002  | 0.002  |
| H (49) | -0.001 | 0.000  |
| H (50) | -0.001 | 0.000  |
| H (51) | -0.001 | 0.000  |
| H (52) | 0.000  | 0.001  |
| H (53) | -0.001 | -0.001 |
| H (54) | 0.062  | 0.061  |

Mulliken atomic charges:  
charge spin

|        |        |       |
|--------|--------|-------|
| C ( 1) | 0.539  | 0.000 |
| C ( 2) | -0.107 | 0.000 |
| C ( 3) | -0.023 | 0.000 |
| C ( 4) | -0.033 | 0.000 |
| C ( 5) | -0.031 | 0.000 |
| C ( 6) | -0.034 | 0.000 |
| C ( 7) | -0.019 | 0.000 |
| C ( 8) | -0.081 | 0.000 |
| C ( 9) | -0.023 | 0.000 |
| C (10) | -0.022 | 0.000 |
| C (11) | -0.080 | 0.000 |
| C (12) | -0.021 | 0.000 |
| C (13) | -0.034 | 0.000 |
| C (14) | -0.030 | 0.000 |
| C (15) | -0.031 | 0.000 |
| C (16) | -0.026 | 0.000 |
| C (17) | -0.032 | 0.000 |
| C (18) | -0.065 | 0.000 |

|         |        |       |
|---------|--------|-------|
| O ( 19) | -0.524 | 0.000 |
| O ( 20) | -0.453 | 0.000 |
| H ( 21) | 0.054  | 0.000 |
| H ( 22) | 0.062  | 0.000 |
| H ( 23) | 0.029  | 0.000 |
| H ( 24) | 0.027  | 0.000 |
| H ( 25) | 0.023  | 0.000 |
| H ( 26) | 0.020  | 0.000 |
| H ( 27) | 0.021  | 0.000 |
| H ( 28) | 0.018  | 0.000 |
| H ( 29) | 0.017  | 0.000 |
| H ( 30) | 0.020  | 0.000 |
| H ( 31) | 0.021  | 0.000 |
| H ( 32) | 0.020  | 0.000 |
| H ( 33) | 0.026  | 0.000 |
| H ( 34) | 0.034  | 0.000 |
| H ( 35) | 0.018  | 0.000 |
| H ( 36) | 0.018  | 0.000 |
| H ( 37) | 0.035  | 0.000 |
| H ( 38) | 0.026  | 0.000 |
| H ( 39) | 0.020  | 0.000 |
| H ( 40) | 0.020  | 0.000 |
| H ( 41) | 0.019  | 0.000 |
| H ( 42) | 0.016  | 0.000 |
| H ( 43) | 0.016  | 0.000 |
| H ( 44) | 0.018  | 0.000 |
| H ( 45) | 0.017  | 0.000 |
| H ( 46) | 0.015  | 0.000 |
| H ( 47) | 0.015  | 0.000 |
| H ( 48) | 0.016  | 0.000 |
| H ( 49) | 0.017  | 0.000 |
| H ( 50) | 0.016  | 0.000 |
| H ( 51) | 0.020  | 0.000 |
| H ( 52) | 0.020  | 0.000 |
| H ( 53) | 0.018  | 0.000 |
| H ( 54) | 0.281  | 0.000 |

Fukui Indices for Electrophilic Attack (Fukui(-))

| atom    | Mulliken | Hirshfeld |
|---------|----------|-----------|
| C ( 1)  | 0.009    | 0.000     |
| C ( 2)  | -0.006   | 0.004     |
| C ( 3)  | 0.006    | 0.004     |
| C ( 4)  | 0.003    | 0.002     |
| C ( 5)  | -0.005   | 0.005     |
| C ( 6)  | -0.007   | 0.008     |
| C ( 7)  | -0.011   | 0.020     |
| C ( 8)  | -0.020   | 0.035     |
| C ( 9)  | 0.172    | 0.209     |
| C ( 10) | 0.165    | 0.209     |
| C ( 11) | -0.019   | 0.036     |
| C ( 12) | -0.012   | 0.021     |
| C ( 13) | -0.006   | 0.008     |
| C ( 14) | -0.005   | 0.004     |
| C ( 15) | -0.001   | 0.003     |
| C ( 16) | -0.002   | 0.001     |
| C ( 17) | -0.002   | 0.001     |
| C ( 18) | -0.002   | 0.001     |
| O ( 19) | 0.003    | 0.004     |
| O ( 20) | -0.013   | -0.009    |
| H ( 21) | 0.003    | 0.006     |
| H ( 22) | 0.002    | -0.002    |
| H ( 23) | 0.003    | 0.002     |
| H ( 24) | 0.000    | -0.001    |
| H ( 25) | 0.002    | 0.002     |
| H ( 26) | -0.002   | -0.001    |
| H ( 27) | 0.010    | 0.004     |
| H ( 28) | 0.007    | 0.002     |
| H ( 29) | 0.015    | 0.009     |
| H ( 30) | 0.012    | 0.007     |
| H ( 31) | 0.032    | 0.015     |
| H ( 32) | 0.037    | 0.017     |
| H ( 33) | 0.052    | 0.026     |

|         |       |        |
|---------|-------|--------|
| H ( 34) | 0.081 | 0.055  |
| H ( 35) | 0.113 | 0.073  |
| H ( 36) | 0.114 | 0.074  |
| H ( 37) | 0.081 | 0.052  |
| H ( 38) | 0.055 | 0.029  |
| H ( 39) | 0.037 | 0.017  |
| H ( 40) | 0.035 | 0.020  |
| H ( 41) | 0.011 | 0.006  |
| H ( 42) | 0.016 | 0.007  |
| H ( 43) | 0.009 | 0.004  |
| H ( 44) | 0.007 | 0.003  |
| H ( 45) | 0.004 | 0.003  |
| H ( 46) | 0.004 | 0.000  |
| H ( 47) | 0.004 | 0.001  |
| H ( 48) | 0.000 | -0.001 |
| H ( 49) | 0.002 | 0.000  |
| H ( 50) | 0.002 | 0.000  |
| H ( 51) | 0.002 | 0.000  |
| H ( 52) | 0.001 | 0.000  |
| H ( 53) | 0.002 | 0.001  |
| H ( 54) | 0.003 | 0.002  |

## OLEIC ACID (PROTONATED)

Fukui Indices for Nucleophilic Attack (Fukui(+))

| atom   | Mulliken | Hirshfeld |
|--------|----------|-----------|
| C ( 1) | 0.289    | 0.254     |
| C ( 2) | -0.039   | 0.047     |
| C ( 3) | -0.015   | 0.033     |
| C ( 4) | -0.012   | 0.006     |
| C ( 5) | -0.004   | 0.006     |
| C ( 6) | -0.002   | 0.003     |
| C ( 7) | -0.001   | 0.001     |
| C ( 8) | 0.001    | 0.001     |
| C ( 9) | 0.000    | 0.000     |
| C (10) | 0.001    | 0.001     |
| C (11) | 0.000    | 0.000     |
| C (12) | 0.000    | 0.000     |
| C (13) | 0.000    | 0.000     |
| C (14) | 0.000    | 0.000     |
| C (15) | 0.000    | 0.000     |
| C (16) | 0.000    | 0.000     |
| C (17) | 0.000    | 0.000     |
| C (18) | 0.000    | 0.000     |
| O (19) | 0.161    | 0.165     |
| O (20) | 0.163    | 0.163     |
| H (21) | 0.073    | 0.041     |
| H (22) | 0.096    | 0.061     |
| H (23) | 0.056    | 0.033     |
| H (24) | 0.043    | 0.022     |
| H (25) | 0.015    | 0.007     |
| H (26) | 0.023    | 0.011     |
| H (27) | 0.010    | 0.005     |
| H (28) | 0.010    | 0.005     |
| H (29) | 0.004    | 0.002     |
| H (30) | 0.004    | 0.002     |
| H (31) | 0.002    | 0.001     |
| H (32) | 0.001    | 0.000     |
| H (33) | 0.001    | 0.001     |
| H (34) | 0.000    | 0.000     |
| H (35) | 0.000    | 0.000     |
| H (36) | 0.001    | 0.001     |
| H (37) | 0.000    | -0.001    |
| H (38) | 0.001    | 0.000     |
| H (39) | 0.000    | 0.000     |
| H (40) | 0.000    | 0.000     |
| H (41) | 0.001    | 0.001     |
| H (42) | 0.000    | 0.000     |
| H (43) | 0.000    | 0.000     |



|         |       |       |
|---------|-------|-------|
| H ( 44) | 0.000 | 0.000 |
| H ( 45) | 0.000 | 0.000 |
| H ( 46) | 0.000 | 0.000 |
| H ( 47) | 0.000 | 0.000 |
| H ( 48) | 0.000 | 0.000 |
| H ( 49) | 0.000 | 0.000 |
| H ( 50) | 0.000 | 0.000 |
| H ( 51) | 0.000 | 0.000 |
| H ( 52) | 0.000 | 0.000 |
| H ( 53) | 0.000 | 0.000 |
| H ( 54) | 0.057 | 0.063 |
| H ( 55) | 0.056 | 0.062 |

Mulliken atomic charges:

|         | charge | spin  |
|---------|--------|-------|
| C ( 1)  | 0.632  | 0.000 |
| C ( 2)  | -0.111 | 0.000 |
| C ( 3)  | -0.043 | 0.000 |
| C ( 4)  | -0.034 | 0.000 |
| C ( 5)  | -0.032 | 0.000 |
| C ( 6)  | -0.035 | 0.000 |
| C ( 7)  | -0.020 | 0.000 |
| C ( 8)  | -0.079 | 0.000 |
| C ( 9)  | -0.025 | 0.000 |
| C ( 10) | -0.022 | 0.000 |
| C ( 11) | -0.076 | 0.000 |
| C ( 12) | -0.022 | 0.000 |
| C ( 13) | -0.034 | 0.000 |
| C ( 14) | -0.031 | 0.000 |
| C ( 15) | -0.030 | 0.000 |
| C ( 16) | -0.025 | 0.000 |
| C ( 17) | -0.031 | 0.000 |
| C ( 18) | -0.065 | 0.000 |
| O ( 19) | -0.309 | 0.000 |
| O ( 20) | -0.314 | 0.000 |
| H ( 21) | 0.093  | 0.000 |
| H ( 22) | 0.105  | 0.000 |
| H ( 23) | 0.055  | 0.000 |
| H ( 24) | 0.054  | 0.000 |
| H ( 25) | 0.033  | 0.000 |
| H ( 26) | 0.032  | 0.000 |
| H ( 27) | 0.025  | 0.000 |
| H ( 28) | 0.025  | 0.000 |
| H ( 29) | 0.022  | 0.000 |
| H ( 30) | 0.021  | 0.000 |
| H ( 31) | 0.021  | 0.000 |
| H ( 32) | 0.019  | 0.000 |
| H ( 33) | 0.036  | 0.000 |
| H ( 34) | 0.027  | 0.000 |
| H ( 35) | 0.016  | 0.000 |
| H ( 36) | 0.016  | 0.000 |
| H ( 37) | 0.035  | 0.000 |
| H ( 38) | 0.029  | 0.000 |
| H ( 39) | 0.020  | 0.000 |
| H ( 40) | 0.020  | 0.000 |
| H ( 41) | 0.018  | 0.000 |
| H ( 42) | 0.017  | 0.000 |
| H ( 43) | 0.016  | 0.000 |
| H ( 44) | 0.018  | 0.000 |
| H ( 45) | 0.016  | 0.000 |
| H ( 46) | 0.015  | 0.000 |
| H ( 47) | 0.014  | 0.000 |
| H ( 48) | 0.016  | 0.000 |
| H ( 49) | 0.016  | 0.000 |
| H ( 50) | 0.016  | 0.000 |
| H ( 51) | 0.020  | 0.000 |
| H ( 52) | 0.020  | 0.000 |
| H ( 53) | 0.018  | 0.000 |
| H ( 54) | 0.340  | 0.000 |
| H ( 55) | 0.341  | 0.000 |

Fukui Indices for Electrophilic Attack (Fukui(-))

| atom   | Mulliken | Hirshfeld |
|--------|----------|-----------|
| C ( 1) | -0.001   | 0.000     |
| C ( 2) | 0.000    | 0.000     |
| C ( 3) | -0.001   | 0.001     |
| C ( 4) | -0.001   | 0.002     |
| C ( 5) | -0.004   | 0.004     |
| C ( 6) | -0.005   | 0.008     |
| C ( 7) | -0.009   | 0.021     |
| C ( 8) | -0.030   | 0.035     |
| C ( 9) | 0.175    | 0.210     |
| C (10) | 0.176    | 0.210     |
| C (11) | -0.029   | 0.036     |
| C (12) | -0.011   | 0.018     |
| C (13) | -0.005   | 0.007     |
| C (14) | -0.003   | 0.004     |
| C (15) | -0.001   | 0.003     |
| C (16) | -0.001   | 0.001     |
| C (17) | 0.000    | 0.001     |
| C (18) | 0.000    | 0.000     |
| O (19) | 0.002    | 0.001     |
| O (20) | 0.002    | 0.001     |
| H (21) | 0.000    | 0.000     |
| H (22) | 0.001    | 0.000     |
| H (23) | 0.003    | 0.002     |
| H (24) | 0.001    | 0.000     |
| H (25) | 0.004    | 0.003     |
| H (26) | 0.003    | 0.002     |
| H (27) | 0.008    | 0.004     |
| H (28) | 0.007    | 0.004     |
| H (29) | 0.015    | 0.008     |
| H (30) | 0.015    | 0.008     |
| H (31) | 0.037    | 0.019     |
| H (32) | 0.031    | 0.017     |
| H (33) | 0.082    | 0.053     |
| H (34) | 0.052    | 0.026     |
| H (35) | 0.115    | 0.073     |
| H (36) | 0.113    | 0.072     |
| H (37) | 0.087    | 0.058     |
| H (38) | 0.053    | 0.027     |
| H (39) | 0.036    | 0.018     |
| H (40) | 0.028    | 0.014     |
| H (41) | 0.013    | 0.007     |
| H (42) | 0.014    | 0.007     |
| H (43) | 0.007    | 0.003     |
| H (44) | 0.007    | 0.004     |
| H (45) | 0.003    | 0.002     |
| H (46) | 0.004    | 0.002     |
| H (47) | 0.002    | 0.001     |
| H (48) | 0.002    | 0.001     |
| H (49) | 0.001    | 0.001     |
| H (50) | 0.001    | 0.000     |
| H (51) | 0.001    | 0.000     |
| H (52) | 0.000    | 0.000     |
| H (53) | 0.001    | 0.001     |
| H (54) | -0.001   | 0.000     |
| H (55) | -0.001   | 0.000     |

**Table S8**  
**GALLIC ACID(NEUTRAL)**

| Fukui Indices for Nucleophilic Attack (Fukui(+)) |          |           |
|--------------------------------------------------|----------|-----------|
| atom                                             | Mulliken | Hirshfeld |
| C ( 1)                                           | 0.147    | 0.133     |
| C ( 2)                                           | 0.023    | 0.064     |
| C ( 3)                                           | 0.084    | 0.076     |
| C ( 4)                                           | 0.026    | 0.041     |

|         |       |       |
|---------|-------|-------|
| O ( 5)  | 0.030 | 0.032 |
| C ( 6)  | 0.093 | 0.077 |
| O ( 7)  | 0.048 | 0.054 |
| C ( 8)  | 0.026 | 0.040 |
| O ( 9)  | 0.026 | 0.029 |
| C ( 10) | 0.084 | 0.073 |
| O ( 11) | 0.147 | 0.145 |
| O ( 12) | 0.068 | 0.078 |
| H ( 13) | 0.055 | 0.037 |
| H ( 14) | 0.014 | 0.014 |
| H ( 15) | 0.020 | 0.021 |
| H ( 16) | 0.014 | 0.015 |
| H ( 17) | 0.056 | 0.036 |
| H ( 18) | 0.039 | 0.036 |

Mulliken atomic charges:  
charge spin

|         |        |       |
|---------|--------|-------|
| C ( 1)  | 0.526  | 0.000 |
| C ( 2)  | 0.005  | 0.000 |
| C ( 3)  | -0.134 | 0.000 |
| C ( 4)  | 0.306  | 0.000 |
| O ( 5)  | -0.498 | 0.000 |
| C ( 6)  | 0.244  | 0.000 |
| O ( 7)  | -0.496 | 0.000 |
| C ( 8)  | 0.303  | 0.000 |
| O ( 9)  | -0.504 | 0.000 |
| C ( 10) | -0.142 | 0.000 |
| O ( 11) | -0.530 | 0.000 |
| O ( 12) | -0.458 | 0.000 |
| H ( 13) | 0.054  | 0.000 |
| H ( 14) | 0.295  | 0.000 |
| H ( 15) | 0.303  | 0.000 |
| H ( 16) | 0.293  | 0.000 |
| H ( 17) | 0.052  | 0.000 |
| H ( 18) | 0.283  | 0.000 |

Fukui Indices for Electrophilic Attack (Fukui(-))

| atom    | Mulliken | Hirshfeld |
|---------|----------|-----------|
| C ( 1)  | 0.036    | 0.031     |
| C ( 2)  | 0.058    | 0.083     |
| C ( 3)  | 0.048    | 0.047     |
| C ( 4)  | 0.070    | 0.083     |
| O ( 5)  | 0.114    | 0.108     |
| C ( 6)  | 0.100    | 0.104     |
| O ( 7)  | 0.128    | 0.122     |
| C ( 8)  | 0.050    | 0.054     |
| O ( 9)  | 0.050    | 0.052     |
| C ( 10) | 0.059    | 0.060     |
| O ( 11) | 0.056    | 0.056     |
| O ( 12) | 0.022    | 0.026     |
| H ( 13) | 0.050    | 0.029     |
| H ( 14) | 0.032    | 0.036     |
| H ( 15) | 0.037    | 0.041     |
| H ( 16) | 0.022    | 0.024     |
| H ( 17) | 0.049    | 0.031     |
| H ( 18) | 0.018    | 0.015     |

## GALLIC ACID(PROTONATED)

Fukui Indices for Nucleophilic Attack (Fukui(+))

| atom   | Mulliken | Hirshfeld |
|--------|----------|-----------|
| C ( 1) | 0.169    | 0.145     |
| C ( 2) | -0.007   | 0.045     |
| C ( 3) | 0.091    | 0.076     |
| C ( 4) | 0.023    | 0.039     |
| O ( 5) | 0.029    | 0.031     |

|         |       |       |
|---------|-------|-------|
| C ( 6)  | 0.093 | 0.081 |
| O ( 7)  | 0.056 | 0.063 |
| C ( 8)  | 0.026 | 0.039 |
| O ( 9)  | 0.026 | 0.028 |
| C ( 10) | 0.086 | 0.072 |
| O ( 11) | 0.088 | 0.093 |
| O ( 12) | 0.086 | 0.091 |
| H ( 13) | 0.055 | 0.036 |
| H ( 14) | 0.017 | 0.015 |
| H ( 15) | 0.025 | 0.025 |
| H ( 16) | 0.019 | 0.017 |
| H ( 17) | 0.049 | 0.032 |
| H ( 18) | 0.032 | 0.035 |
| H ( 19) | 0.037 | 0.037 |

Mulliken atomic charges:  
charge spin

|         |        |       |
|---------|--------|-------|
| C ( 1)  | 0.615  | 0.000 |
| C ( 2)  | 0.035  | 0.000 |
| C ( 3)  | -0.109 | 0.000 |
| C ( 4)  | 0.323  | 0.000 |
| O ( 5)  | -0.478 | 0.000 |
| C ( 6)  | 0.275  | 0.000 |
| O ( 7)  | -0.454 | 0.000 |
| C ( 8)  | 0.315  | 0.000 |
| O ( 9)  | -0.484 | 0.000 |
| C ( 10) | -0.135 | 0.000 |
| O ( 11) | -0.381 | 0.000 |
| O ( 12) | -0.362 | 0.000 |
| H ( 13) | 0.081  | 0.000 |
| H ( 14) | 0.303  | 0.000 |
| H ( 15) | 0.315  | 0.000 |
| H ( 16) | 0.303  | 0.000 |
| H ( 17) | 0.079  | 0.000 |
| H ( 18) | 0.323  | 0.000 |
| H ( 19) | 0.333  | 0.000 |

Fukui Indices for Electrophilic Attack (Fukui(-))

| atom    | Mulliken | Hirshfeld |
|---------|----------|-----------|
| C ( 1)  | 0.055    | 0.050     |
| C ( 2)  | 0.033    | 0.063     |
| C ( 3)  | 0.066    | 0.062     |
| C ( 4)  | 0.070    | 0.090     |
| O ( 5)  | 0.156    | 0.144     |
| C ( 6)  | 0.080    | 0.081     |
| O ( 7)  | 0.109    | 0.101     |
| C ( 8)  | 0.039    | 0.040     |
| O ( 9)  | 0.039    | 0.040     |
| C ( 10) | 0.062    | 0.058     |
| O ( 11) | 0.051    | 0.047     |
| O ( 12) | 0.047    | 0.043     |
| H ( 13) | 0.048    | 0.031     |
| H ( 14) | 0.036    | 0.044     |
| H ( 15) | 0.028    | 0.032     |
| H ( 16) | 0.013    | 0.017     |
| H ( 17) | 0.042    | 0.027     |
| H ( 18) | 0.011    | 0.014     |
| H ( 19) | 0.014    | 0.018     |

**Table S9**

# Kaempferol (Neutral)

## Indices for Nucleophilic Attack (Fukui(+))

| atom    | Mulliken | Hirshfeld |
|---------|----------|-----------|
| C ( 1)  | 0.091    | 0.078     |
| C ( 2)  | 0.035    | 0.046     |
| C ( 3)  | 0.110    | 0.096     |
| C ( 4)  | 0.006    | 0.024     |
| C ( 5)  | 0.051    | 0.040     |
| C ( 6)  | 0.028    | 0.033     |
| C ( 7)  | 0.030    | 0.038     |
| C ( 8)  | 0.034    | 0.032     |
| C ( 9)  | 0.022    | 0.025     |
| O ( 10) | 0.039    | 0.044     |
| O ( 11) | 0.120    | 0.120     |
| C ( 12) | -0.004   | 0.020     |
| C ( 13) | 0.033    | 0.032     |
| C ( 14) | 0.014    | 0.022     |
| C ( 15) | 0.035    | 0.035     |
| C ( 16) | 0.014    | 0.022     |
| C ( 17) | 0.034    | 0.030     |
| O ( 18) | 0.024    | 0.026     |
| O ( 19) | 0.028    | 0.030     |
| O ( 20) | 0.026    | 0.030     |
| O ( 21) | 0.031    | 0.030     |
| H ( 22) | 0.028    | 0.018     |
| H ( 23) | 0.029    | 0.018     |
| H ( 24) | 0.024    | 0.016     |
| H ( 25) | 0.021    | 0.013     |
| H ( 26) | 0.021    | 0.013     |
| H ( 27) | 0.024    | 0.015     |
| H ( 28) | 0.009    | 0.010     |
| H ( 29) | 0.011    | 0.012     |
| H ( 30) | 0.015    | 0.015     |
| H ( 31) | 0.016    | 0.016     |

## ken atomic chargesMULKIN

|         | charge | spin  |
|---------|--------|-------|
| C ( 1)  | 0.273  | 0.000 |
| C ( 2)  | 0.215  | 0.000 |
| C ( 3)  | 0.316  | 0.000 |
| C ( 4)  | -0.059 | 0.000 |
| C ( 5)  | 0.317  | 0.000 |
| C ( 6)  | -0.172 | 0.000 |
| C ( 7)  | 0.354  | 0.000 |
| C ( 8)  | -0.177 | 0.000 |
| C ( 9)  | 0.330  | 0.000 |
| O ( 10) | -0.495 | 0.000 |
| O ( 11) | -0.579 | 0.000 |
| C ( 12) | 0.013  | 0.000 |
| C ( 13) | -0.040 | 0.000 |
| C ( 14) | -0.086 | 0.000 |
| C ( 15) | 0.343  | 0.000 |
| C ( 16) | -0.081 | 0.000 |
| C ( 17) | -0.076 | 0.000 |
| O ( 18) | -0.484 | 0.000 |
| O ( 19) | -0.479 | 0.000 |
| O ( 20) | -0.468 | 0.000 |
| O ( 21) | -0.504 | 0.000 |
| H ( 22) | 0.061  | 0.000 |
| H ( 23) | 0.052  | 0.000 |

|         |       |       |
|---------|-------|-------|
| H ( 24) | 0.045 | 0.000 |
| H ( 25) | 0.050 | 0.000 |
| H ( 26) | 0.046 | 0.000 |
| H ( 27) | 0.049 | 0.000 |
| H ( 28) | 0.288 | 0.000 |
| H ( 29) | 0.290 | 0.000 |
| H ( 30) | 0.285 | 0.000 |
| H ( 31) | 0.271 | 0.000 |

#### Indices for Electrophilic Attack (Fukui(-))

| atom   | Mulliken | Hirshfeld |
|--------|----------|-----------|
| C ( 1) | 0.065    | 0.061     |
| C ( 2) | 0.080    | 0.082     |
| C ( 3) | 0.027    | 0.029     |
| C ( 4) | 0.018    | 0.020     |
| C ( 5) | 0.030    | 0.031     |
| C ( 6) | 0.031    | 0.030     |
| C ( 7) | 0.020    | 0.029     |
| C ( 8) | 0.055    | 0.055     |
| C ( 9) | 0.012    | 0.018     |
| O (10) | 0.040    | 0.047     |
| O (11) | 0.064    | 0.061     |
| C (12) | 0.016    | 0.025     |
| C (13) | 0.026    | 0.027     |
| C (14) | 0.023    | 0.028     |
| C (15) | 0.027    | 0.035     |
| C (16) | 0.025    | 0.029     |
| C (17) | 0.011    | 0.023     |
| O (18) | 0.041    | 0.040     |
| O (19) | 0.028    | 0.028     |
| O (20) | 0.034    | 0.036     |
| O (21) | 0.100    | 0.097     |
| H (22) | 0.024    | 0.015     |
| H (23) | 0.035    | 0.022     |
| H (24) | 0.027    | 0.015     |
| H (25) | 0.023    | 0.015     |
| H (26) | 0.024    | 0.016     |
| H (27) | 0.027    | 0.015     |
| H (28) | 0.013    | 0.014     |
| H (29) | 0.011    | 0.012     |
| H (30) | 0.014    | 0.015     |
| H (31) | 0.029    | 0.029     |

## Kaempferol(protonated)

#### Fukui Indices for Nucleophilic Attack (Fukui(+))

| atom   | Mulliken | Hirshfeld |
|--------|----------|-----------|
| C ( 1) | 0.103    | 0.076     |
| C ( 2) | 0.031    | 0.049     |
| C ( 3) | 0.127    | 0.113     |
| C ( 4) | 0.002    | 0.025     |
| C ( 5) | 0.048    | 0.038     |
| C ( 6) | 0.024    | 0.029     |
| C ( 7) | 0.040    | 0.046     |
| C ( 8) | 0.029    | 0.031     |
| C ( 9) | 0.042    | 0.033     |
| O (10) | 0.009    | 0.025     |
| O (11) | 0.137    | 0.138     |
| C (12) | -0.007   | 0.012     |
| C (13) | 0.022    | 0.024     |
| C (14) | 0.013    | 0.018     |
| C (15) | 0.023    | 0.025     |
| C (16) | 0.013    | 0.018     |
| C (17) | 0.020    | 0.023     |
| O (18) | 0.021    | 0.022     |
| O (19) | 0.035    | 0.037     |
| O (20) | 0.028    | 0.032     |

|         |       |       |
|---------|-------|-------|
| O ( 21) | 0.034 | 0.034 |
| H ( 22) | 0.027 | 0.017 |
| H ( 23) | 0.028 | 0.018 |
| H ( 24) | 0.020 | 0.017 |
| H ( 25) | 0.021 | 0.012 |
| H ( 26) | 0.017 | 0.011 |
| H ( 27) | 0.017 | 0.011 |
| H ( 28) | 0.021 | 0.012 |
| H ( 29) | 0.008 | 0.008 |
| H ( 30) | 0.015 | 0.015 |
| H ( 31) | 0.015 | 0.015 |
| H ( 32) | 0.017 | 0.017 |

Mulliken atomic charges:  
charge spin

|         |        |       |
|---------|--------|-------|
| C ( 1)  | 0.257  | 0.000 |
| C ( 2)  | 0.268  | 0.000 |
| C ( 3)  | 0.339  | 0.000 |
| C ( 4)  | -0.033 | 0.000 |
| C ( 5)  | 0.335  | 0.000 |
| C ( 6)  | -0.146 | 0.000 |
| C ( 7)  | 0.365  | 0.000 |
| C ( 8)  | -0.151 | 0.000 |
| C ( 9)  | 0.349  | 0.000 |
| O ( 10) | -0.430 | 0.000 |
| O ( 11) | -0.500 | 0.000 |
| C ( 12) | -0.016 | 0.000 |
| C ( 13) | -0.031 | 0.000 |
| C ( 14) | -0.076 | 0.000 |
| C ( 15) | 0.357  | 0.000 |
| C ( 16) | -0.069 | 0.000 |
| C ( 17) | -0.045 | 0.000 |
| O ( 18) | -0.466 | 0.000 |
| O ( 19) | -0.451 | 0.000 |
| O ( 20) | -0.444 | 0.000 |
| O ( 21) | -0.466 | 0.000 |
| H ( 22) | 0.081  | 0.000 |
| H ( 23) | 0.091  | 0.000 |
| H ( 24) |        |       |
| H ( 25) | 0.059  | 0.000 |
| H ( 26) | 0.367  | 0.000 |
| 0.061   |        |       |

0.000  
 H ( 27)  
 0.057  
 0.000  
 H ( 28)  
 0.058  
 0.000  
 H ( 29)  
 0.294  
 0.000  
 H ( 30)  
 0.301  
 0.000  
 H ( 31)  
 0.296  
 0.000  
 H ( 32)  
 0.286  
 0.000

Fukui Indices for Electrophilic Attack (Fukui(-))

| atom    | Mulliken | Hirshfeld |
|---------|----------|-----------|
| C ( 1)  | 0.044    | 0.045     |
| C ( 2)  | 0.063    | 0.060     |
| C ( 3)  | 0.016    | 0.018     |
| C ( 4)  | 0.018    | 0.019     |
| C ( 5)  | 0.017    | 0.018     |
| C ( 6)  | 0.015    | 0.014     |
| C ( 7)  | 0.011    | 0.017     |
| C ( 8)  | 0.031    | 0.029     |
| C ( 9)  | 0.008    | 0.012     |
| O ( 10) | 0.004    | 0.016     |
| O ( 11) | 0.041    | 0.039     |
| C ( 12) | 0.043    | 0.062     |
| C ( 13) | 0.037    | 0.041     |
| C ( 14) | 0.050    | 0.053     |
| C ( 15) | 0.043    | 0.061     |
| C ( 16) | 0.052    | 0.056     |
| C ( 17) | 0.029    | 0.037     |
| O ( 18) | 0.093    | 0.089     |
| O ( 19) | 0.021    | 0.020     |
| O ( 20) | 0.020    | 0.021     |
| O ( 21) | 0.076    | 0.073     |
| H ( 22) | 0.013    | 0.008     |
| H ( 23) | 0.018    | 0.012     |
| H ( 24) | 0.021    | 0.016     |
| H ( 25) | 0.036    | 0.022     |
| H ( 26) | 0.040    | 0.026     |
| H ( 27) | 0.041    | 0.027     |
| H ( 28) | 0.036    | 0.022     |
| H ( 29) | 0.026    | 0.029     |
| H ( 30) | 0.005    | 0.007     |
| H ( 31) | 0.009    | 0.009     |
| H ( 32) | 0.024    | 0.024     |



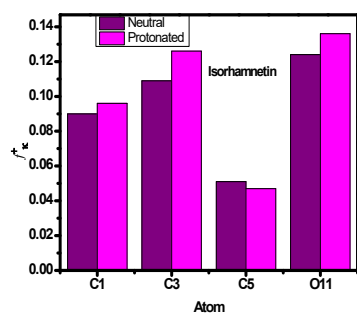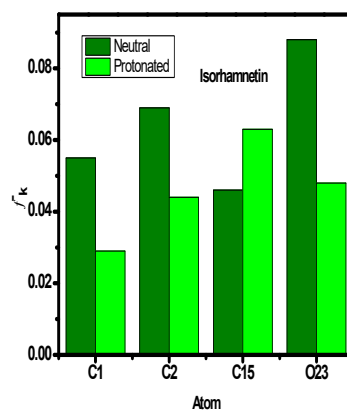

Fig. S10. Graphical representation of the Fukui indices of Isorhamnetin for the more reactive atoms in the un-protonated and protonated form.

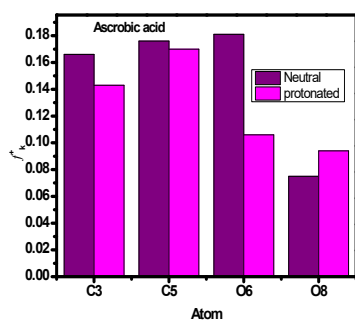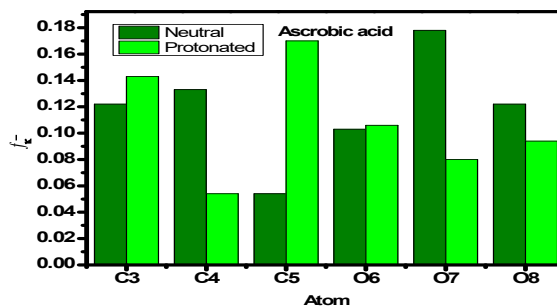

Fig. S11. Graphical representation of the Fukui indices of Ascorbic acid for the more reactive atoms in the un-protonated and protonated form.

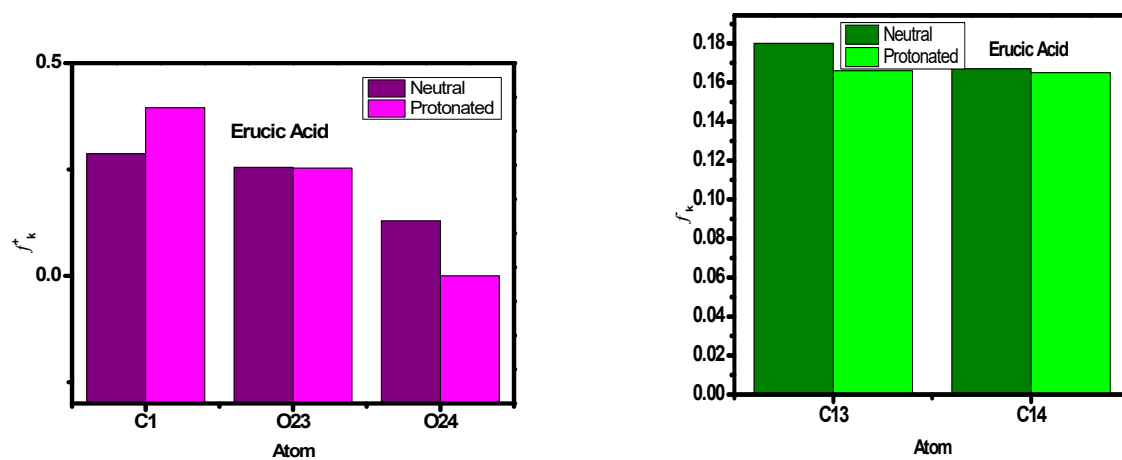

Fig. S13. Graphical representation of the Fukui indices of Erucic acid for the more reactive atoms in the unprotonated and protonated form.

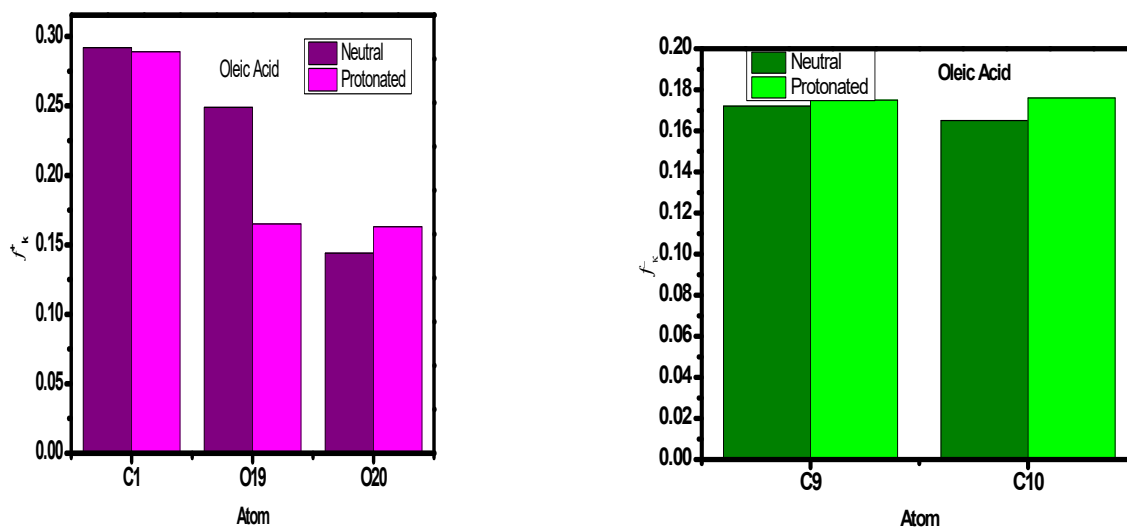

Fig. S14. Graphical representation of the Fukui indices of Oleic acid for the more reactive atoms in the unprotonated and protonated form.

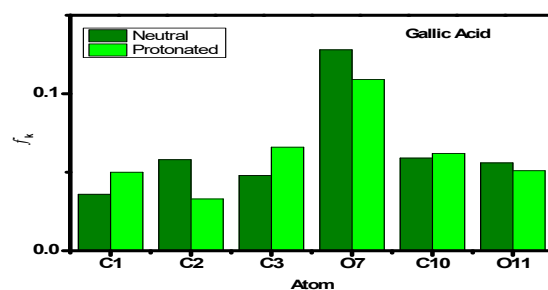

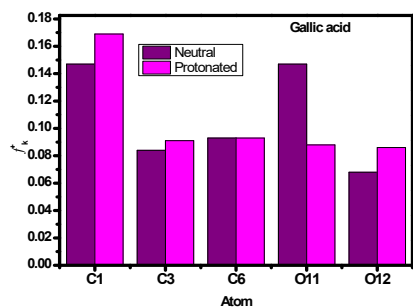

Fig. S15. Graphical representation of the Fukui indices of Gallic acid for the more reactive atoms in the unprotonated and protonated form.

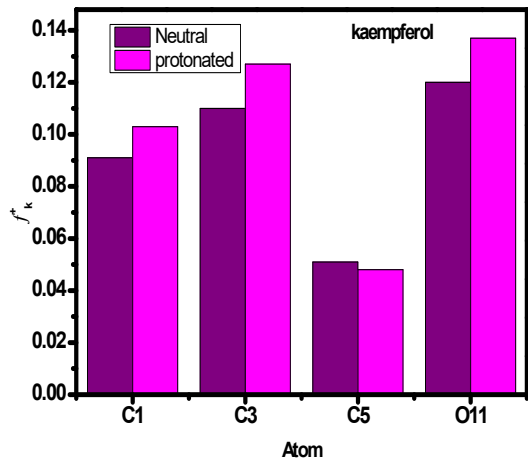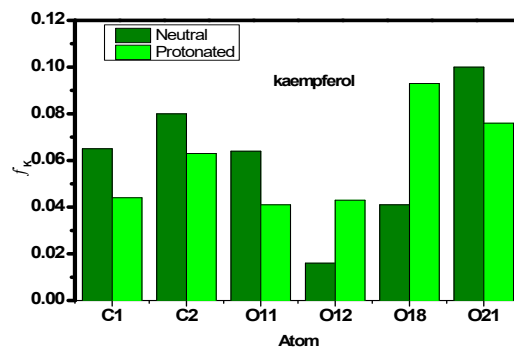

Fig. S16. Graphical representation of the Fukui indices of kaempferol acid for the more reactive atoms in the unprotonated and protonated form.
